# Supplementary material for: Safety profile of upadacitinib over 15 000 patient-years across rheumatoid arthritis, psoriatic arthritis, ankylosing spondylitis and atopic dermatitis
Source: HighWire-hosted journal article supplement (doi:10.1136/rmdopen-2022-002735), 2023-02-01

## SUPPLEMENTAL MATERIAL

### **Safety profile of upadacitinib over 15,000 patient-years across rheumatoid arthritis, psoriatic arthritis, ankylosing spondylitis and atopic dermatitis**

Gerd R Burmester, Stanley B Cohen, Kevin L Winthrop, Peter Nash, Alan D Irvine, Atul Deodhar, Eduardo Mysler, Yoshiya Tanaka, Jianzhong Liu, Ana P Lacerda, Hannah Palac, Tim Shaw, Philip J Mease, Emma Guttman-Yassky

### Active tuberculosis

Active tuberculosis (TB) was reported in patients with rheumatoid arthritis (RA) ( $<0.1/100$  patient-years [PY] for upadacitinib and  $0.2/100$  PY for adalimumab) and atopic dermatitis (AD) ( $<0.1$  E/100 PY for each upadacitinib 15 mg and 30 mg). A total of five RA patients receiving upadacitinib were diagnosed with active TB including one patient with female genital tract and peritoneal TB, two with pulmonary TB, one with disseminated TB and one with non-specified TB (**supplemental table S11**). Four of these five patients had latent TB at study entry, and the remaining patient cohabitated with individuals who have had TB. Of the four patients with latent TB at study entry, one patient received adequate treatment, one started treatment 23 days prior to study entry but discontinued at study day 10 due to inability to obtain the TB treatment, one was treated but no information regarding treatment duration is available and the fourth was provided TB treatment for 2 years prior to the event of active TB occurrence. An additional two patients with AD also experienced active TB: one patient receiving upadacitinib 15 mg diagnosed with pulmonary TB and one patient receiving upadacitinib 30 mg diagnosed with non-specified TB. Travel to an endemic country was identified in one patient with AD and TB and the other lived in Russia, which has a high TB burden.

### GI perforation

No events of adjudicated gastrointestinal (GI) perforation were observed in patients with ankylosing spondylitis (AS) or AD. The rate of adjudicated GI perforation in RA was  $<0.1/100$  PY with five total events and  $0.1/100$  PY with two total events in patients with psoriatic arthritis (PsA). GI perforation was due to a traffic accident in one patient with RA that was conservatively included in the analysis, and risk factors (concomitant non-steroidal anti-inflammatory drugs (NSAID) use and history of diverticulosis) or other causes were reported for the majority of the remaining events.<sup>1,2</sup> The exposure-adjusted rate is consistent with rates reported in other clinical programs studying RA and in observational studies of patients with RA. One episode of gastric ulcer perforation attributed to concomitant NSAID use and one episode of enterovesical fistula attributed to a history of diverticulosis occurred in patients with PsA.

**AEs related to laboratory parameters**

Anemia was most prevalent in patients with RA taking upadacitinib (3.0 E/100 PY) compared with patients with PsA (2.4 E/100 PY), AS (1.6 E/100 PY) and AD (upadacitinib 15 mg, 1.7 E/100 PY; upadacitinib 30 mg, 2.5 E/100 PY). Rates in RA were comparable to patients receiving adalimumab (3.4 E/100 PY) or methotrexate (3.6 E/100 PY). Anemia leading to discontinuation was  $\leq 0.2$  E/100 PY for all diseases except AS where one event of decreased hemoglobin leading to discontinuation resulted in an event rate of 0.3 E/100 PY.

Rates of neutropenia for patients receiving upadacitinib 15 mg were 2.1 E/100 PY in RA, 1.8 E/100 PY in PsA, 2.8 E/100 PY in AS and 1.6 E/100 PY in AD, but were highest at 2.9 E/100 PY in patients with AD who were receiving upadacitinib 30 mg. Rates were 2.0 E/100 PY for adalimumab and 1.7 E/100 PY for methotrexate in RA. Neutropenia leading to discontinuation of upadacitinib was highest in upadacitinib 30 mg in AD at 0.2 E/100 PY. Lymphopenia rates for patients receiving upadacitinib 15 mg were 1.7 E/100 PY in RA, 2.4 E/100 PY in PsA, 0.9 E/100 PY in AS and 0.5 E/100 PY in AD, with 0.9 E/100 PY among patients receiving upadacitinib 30 mg in AD. No serious events were reported across all diseases. Within the RA studies, rates of lymphopenia were higher in patients receiving methotrexate (3.2 E/100 PY) compared with those receiving upadacitinib (1.7 E/100 PY) or adalimumab (0.9 E/100 PY). Lymphopenia leading to discontinuation of upadacitinib was  $< 0.1$  E/100 PY for all diseases and no apparent association was observed between infections and neutropenia or lymphopenia.

Rates of hepatic disorder varied across diseases with PsA having the highest rates, followed by AS, RA and then AD. Hepatic disorders include liver diseases or laboratory abnormalities that are considered clinically significant and reported as adverse events by the investigator. In RA, rates of hepatic disorder were highest with the methotrexate group followed by upadacitinib then adalimumab; however, rates were higher with adalimumab than with upadacitinib for PsA. Rates of serious hepatic disorders were  $\leq 0.1$  E/100 PY in patients receiving upadacitinib 15 mg in RA and PsA and patients receiving upadacitinib 30 mg in AD with no events of serious hepatic disorder in AS or patients with AD receiving upadacitinib 15 mg. Most events of hepatic disorder involved transaminase elevations. The exposure-adjusted event rates (EAERs) for hepatic disorder

were higher overall for patients receiving upadacitinib 30 mg versus upadacitinib 15 mg in the AD study. Rates of hepatic disorders leading to discontinuation were <0.1 E/100 PY in RA, 0.1 E/100 PY in AS, 0 events in AS and 0.2 E/100 PY in AD among patients receiving upadacitinib 15 mg and 0.4 E/100 PY among patients with AD receiving upadacitinib 30 mg.

Rates of elevations in creatine phosphokinase (CPK) levels were higher for upadacitinib (4.4 E/100 PY) compared with adalimumab (1.6 E/100 PY) and methotrexate (1.4 E/100PY) in RA and compared with adalimumab in PsA (7.9 E/100 PY versus 5.9 E/100 PY, respectively). Events of elevation in blood CPK levels leading to discontinuation were ≤0.1 E/100 PY in all groups except for patients with AD who were receiving upadacitinib 30 mg (0.3 E/100 PY). Upadacitinib 30 mg resulted in higher rates of elevations of CPK levels than did upadacitinib 15 mg (9.1 E/100 PY versus 6.8 E/100 PY, respectively) in AD.

## References

1. Pavlidis ET, Pavlidis TE. Current Aspects on the Management of Perforated Acute Diverticulitis: A Narrative Review. *Cureus* 2022;14(8):e28446. doi: 10.7759/cureus.28446 [published Online First: 20220826]
2. Kapp JR, Muller PC, Gertsch P, et al. A systematic review of the perforated duodenal diverticula: lessons learned from the last decade. *Langenbecks Arch Surg* 2022;407(1):25-35. doi: 10.1007/s00423-021-02238-1 [published Online First: 20210623]

**Online Supplemental Table S1** Summary of studies included in the safety analysis

| Study                         | NCT number  | Patients Enrolled and Received Treatment   | Patient population                                                                                               | Treatments                                                                              | Study duration                                  |
|-------------------------------|-------------|--------------------------------------------|------------------------------------------------------------------------------------------------------------------|-----------------------------------------------------------------------------------------|-------------------------------------------------|
| <b>RA</b>                     |             |                                            |                                                                                                                  |                                                                                         |                                                 |
| M13-549<br>SELECT-NEXT        | NCT02675426 | Period 1:<br>661<br><br>Period 2:<br>618   | RA patients receiving stable dose of csDMARDs with inadequate response to csDMARDs                               | Period 1: PBO and UPA 15 mg QD or 30 mg QD<br><br>Period 2: UPA 15 mg QD or 30 mg QD    | Period 1: 12 weeks<br><br>Period 2: LTE ongoing |
| M15-555<br>SELECT-MONOTHERAPY | NCT02706951 | Period 1:<br>648<br><br>Period 2:<br>603   | RA patients with inadequate response to MTX                                                                      | Period 1: MTX, UPA 15 mg QD or 30 mg QD<br><br>Period 2: UPA 15 mg QD or 30 mg QD       | Period 1: 14 weeks<br><br>Period 2: LTE ongoing |
| M13-542<br>SELECT-BEYOND      | NCT02706847 | Period 1:<br>498<br><br>Period 2:<br>428   | RA patients with inadequate response or intolerance to bDMARDs and currently receiving a stable dose of csDMARDs | Period 1: PBO and UPA 15 mg QD or 30 mg QD<br><br>Period 2: UPA 15 mg QD or 30 mg QD    | Period 1: 24 weeks<br><br>Period 2: LTE ongoing |
| M14-465<br>SELECT-COMPARE     | NCT02629159 | Period 1:<br>1629<br><br>Period 2:<br>1403 | RA patients with inadequate response to MTX while receiving a stable MTX dose                                    | Period 1: PBO, ADA 40 mg EOW, UPA 15 mg QD<br><br>Period 2: ADA 40 mg EOW, UPA 15 mg QD | Period 1: 48 weeks<br><br>Period 2: LTE ongoing |

| Study                    | NCT number  | Patients Enrolled and Received Treatment | Patient population                                                                                                       | Treatments                                                                                 | Study duration                                                                                                                                                                      |
|--------------------------|-------------|------------------------------------------|--------------------------------------------------------------------------------------------------------------------------|--------------------------------------------------------------------------------------------|-------------------------------------------------------------------------------------------------------------------------------------------------------------------------------------|
| M13-545<br>SELECT-EARLY  | NCT02706873 | Period 1:<br>945<br><br>Period 2:<br>844 | MTX-naïve RA patients                                                                                                    | Period 1: MTX, UPA<br>15 mg QD or 30 mg<br>QD<br><br>Period 2: UPA 15 mg<br>QD or 30 mg QD | Period 1: 48<br>weeks<br><br>Period 2: LTE,<br>ongoing                                                                                                                              |
| M15-925<br>SELECT-CHOICE | NCT03086343 | Period 1:<br>612<br><br>Period 2:<br>590 | RA patients with<br>inadequate response<br>or intolerance to<br>bDMARDS receiving<br>stable csDMARDS,<br>abatacept-naïve | Period 1: abatacept<br>IV, UPA 15 mg QD<br><br>Period 2: UPA 15 mg<br>QD                   | Period 1: 24<br>weeks<br><br>Period 2: LTE,<br>ongoing                                                                                                                              |
| <b>PsA</b>               |             |                                          |                                                                                                                          |                                                                                            |                                                                                                                                                                                     |
| M15-554<br>SELECT-PsA 2  | NCT03104374 | 641                                      | PsA patients with<br>inadequate response<br>or intolerance to<br>bDMARDS                                                 | Period 1: PBO, UPA<br>15 mg QD or 30 mg<br>QD<br><br>Period 2: UPA 15 mg<br>QD or 30 mg QD | Period 1: 24<br>weeks DB,<br>parallel group<br>then 32 weeks<br>blinded<br>treatment with<br>PBO switched<br>to UPA 15 mg<br>or 30 mg<br><br>Period 2: Up to<br>3 years,<br>ongoing |
| M15-572<br>SELECT-PsA 1  | NCT03104400 | 1704                                     | PsA patients with<br>inadequate response<br>or intolerance to non-<br>bDMARDS                                            | Period 1: PBO, UPA<br>15 mg QD or 30 mg<br>QD, ADA 40 mg<br>EOW                            | Period 1: 24-<br>week DB,<br>parallel group<br>PBO and<br>active                                                                                                                    |

| Study                    | NCT number  | Patients Enrolled and Received Treatment | Patient population                                                                                            | Treatments                                                                                      | Study duration                                                                                                                                        |
|--------------------------|-------------|------------------------------------------|---------------------------------------------------------------------------------------------------------------|-------------------------------------------------------------------------------------------------|-------------------------------------------------------------------------------------------------------------------------------------------------------|
|                          |             |                                          |                                                                                                               | Period 2: UPA 15 mg QD or 30 mg QD, ADA 40 mg EOW                                               | comparator-controlled followed by 32-week blinded treatment with PBO switched to UPA 15 mg QD or 30 mg QD<br><br>Period 2: OLE up to 5 years, ongoing |
| <b>AS</b>                |             |                                          |                                                                                                               |                                                                                                 |                                                                                                                                                       |
| M16-098<br>SELECT-AXIS 1 | NCT03178487 | 187                                      | Patients with active AS and inadequate response to $\geq 2$ NSAIDs or intolerance to NSAIDs, and bDMARD-naïve | Period 1: PBO, UPA 15 mg QD<br><br>Period 2: UPA 15 mg QD                                       | Period 1: 14 weeks DB, PBO-controlled<br><br>Period 2: 90-Week OL LTE                                                                                 |
| <b>AD</b>                |             |                                          |                                                                                                               |                                                                                                 |                                                                                                                                                       |
| M16-045<br>Measure UP 1  | NCT03569293 | 847                                      | Adolescents (up to 180 will be adolescent) and adults with moderate-to-severe AD                              | PBO, UPA 15 mg QD or 30 mg QD<br><br>(Extension: PBO re-randomized to UPA 15 mg QD or 30 mg QD) | 16-week, DB, PBO-controlled, up to 260 weeks blinded extension, ongoing                                                                               |
| M16-047<br>AD Up         | NCT03568318 | 901                                      | Adolescents and adults with moderate-to-severe AD                                                             | PBO, UPA 15 mg QD or 30 mg QD<br><br>(Extension: PBO re-randomized to UPA                       | 16-week, DB, PBO-controlled up to 260 weeks blinded                                                                                                   |

| Study                   | NCT number  | Patients Enrolled and Received Treatment | Patient population                                | Treatments                                                                                                                  | Study duration                                                                    |
|-------------------------|-------------|------------------------------------------|---------------------------------------------------|-----------------------------------------------------------------------------------------------------------------------------|-----------------------------------------------------------------------------------|
| M18-891<br>Measure Up 2 | NCT03607422 | 836                                      | Adolescents and adults with moderate-to-severe AD | 15 mg QD or 30 mg QD<br><br>PBO, UPA 15 mg QD or 30 mg QD<br><br>(Extension: PBO re-randomized to UPA 15 mg QD or 30 mg QD) | extension, ongoing<br><br>16-week, DB, PBO-controlled up to 260 weeks blinded LTE |

AD, atopic dermatitis; ADA, adalimumab; AS, ankylosing spondylitis; bDMARD, biologic disease-modifying anti-rheumatic drug; csDMARD, conventional synthetic disease-modifying anti-rheumatic drug; DB, double blind; EOW, every other week; LTE, long-term extension; MTX, methotrexate; NSAIDs, non-steroidal anti-inflammatory drugs; OL, open label; OLE, open-label extension; PBO, placebo; PsA, psoriatic arthritis; QD, once daily; RA, rheumatoid arthritis; UPA, upadacitinib.



**Online Supplemental Table S2. Exposure and overview of TEAEs by upadacitinib monotherapy and upadacitinib combination therapy**

| Parameter                            | RA                                   |                                               | PsA                                  |                                              |
|--------------------------------------|--------------------------------------|-----------------------------------------------|--------------------------------------|----------------------------------------------|
|                                      | UPA 15 mg QD<br>Monotherapy<br>N=661 | UPA 15 mg QD<br>csDMARD Combination<br>N=2548 | UPA 15 mg QD<br>Monotherapy<br>N=265 | UPA 15 mg QD<br>csDMARD Combination<br>N=642 |
| Exposure                             |                                      |                                               |                                      |                                              |
| Total, PY                            | 2100.1                               | 6979.0                                        | 513.9                                | 1358.4                                       |
| Median (minimum,<br>maximum), years* | 3.91<br>(0.01, 5.01)                 | 2.95<br>(0, 5.45)                             | 2.25<br>(0, 3.75)                    | 2.25<br>(0, 3.90)                            |
| Overall TEAEs, E/100 PYs (95%<br>CI) |                                      |                                               |                                      |                                              |
| Any AE                               | 208.9<br>(202.8, 215.2)              | 204.4<br>(201.1, 207.8)                       | 248.1<br>(234.7, 262.1)              | 243.6<br>(235.4, 252.0)                      |
| Any serious AE                       | 12.8<br>(11.3, 14.4)                 | 12.3<br>(11.5, 13.2)                          | 9.9<br>(7.4, 13.0)                   | 11.6<br>(9.8, 13.5)                          |
| Any AE leading to<br>discontinuation | 5.5<br>(4.5, 6.6)                    | 4.7<br>(4.2, 5.2)                             | 6.6<br>(4.6, 9.2)                    | 5.0<br>(3.9, 6.3)                            |
| Deaths†, E/100 PY<br>(95% CI)        | 0.6<br>(0.3, 1.0)                    | 0.9<br>(0.7, 1.1)                             | 0.2<br>(0, 1.1)                      | 1.0<br>(0.6, 1.7)                            |

\*Minimum in days are as follows: RA: UPA 15 mg monotherapy, 4 days; UPA 15 mg combination, 2 days. PsA: UPA 15 mg monotherapy, 1 day; UPA 15 mg combination, 2 days; ADA 40 mg monotherapy, 29 days; ADA 40 mg combination, 14 days.

†Non-treatment emergent deaths included.

AE, adverse event; csDMARD, conventional synthetic disease-modifying antirheumatic drugs; E/100 PY, events/100 patient-years; PsA, psoriatic arthritis; PY, patient-years; QD, once daily; RA, rheumatoid arthritis; TEAEs, treatment-emergent adverse events; UPA, upadacitinib.

**Online Supplemental Table S3.** Summary of most common (≥5 E/100 PY) AEs with upadacitinib

|                        |                                                                                                                                                                                                                                                                                                                                                                                                                                                                                                                       |
|------------------------|-----------------------------------------------------------------------------------------------------------------------------------------------------------------------------------------------------------------------------------------------------------------------------------------------------------------------------------------------------------------------------------------------------------------------------------------------------------------------------------------------------------------------|
| Rheumatoid arthritis   | Upper respiratory tract infection (7.9 E/100 PY), urinary tract infection (7.6 E/100 PY), nasopharyngitis (7.1 E/100 PY)                                                                                                                                                                                                                                                                                                                                                                                              |
| Psoriatic arthritis    | Upper respiratory tract infection (10.1 E/100 PY), blood creatine phosphokinase levels increased (7.9 E/100 PY), nasopharyngitis (7.5 E/100 PY), urinary tract infection (6.9 E/100 PY), hypertension (5.2 E/100 PY), alanine aminotransferase levels increased (5.1 E/100 PY), bronchitis (5.1 E/100 PY)                                                                                                                                                                                                             |
| Ankylosing spondylitis | Nasopharyngitis (14.7 E/100 PY), blood creatine phosphokinase levels increased (10.9 E/100 PY), upper respiratory tract infection (9.4 E/100 PY), ankylosing spondylitis (5.6 E/100 PY), headache (5.0 E/100 PY)                                                                                                                                                                                                                                                                                                      |
| Atopic dermatitis      | UPA 15 mg: nasopharyngitis (11.5 E/100 PY), acne (11.1 E/100 PY), upper respiratory tract infection (9.9 E/100 PY), dermatitis atopic (9.6 E/100 PY), blood creatine phosphokinase levels increased (6.8 E/100 PY), headache (6.5 E/100 PY)<br>UPA 30 mg: acne (16.3 E/100 PY), nasopharyngitis (9.9 E/100 PY), blood creatine phosphokinase levels increased (9.1 E/100 PY), upper respiratory tract infection (8.9 E/100 PY), oral herpes (7.7 E/100 PY), headache (6.3 E/100 PY), dermatitis atopic (5.3 E/100 PY) |

AEs, adverse events; E/100 PY, events/100 patient-years; UPA, upadacitinib.

**Online Supplemental Table S4.** Observed COVID-19 infections in patients receiving upadacitinib

|                                   | RA                        |                           |               | PsA                      |                           | AS                       | AD                        |                           |
|-----------------------------------|---------------------------|---------------------------|---------------|--------------------------|---------------------------|--------------------------|---------------------------|---------------------------|
| Parameter, n (%)                  | UPA 15 mg<br>QD<br>N=3209 | ADA 40 mg<br>EOW<br>N=579 | MTX<br>N=314  | UPA 15 mg<br>QD<br>N=907 | ADA 40 mg<br>EOW<br>N=429 | UPA 15 mg<br>QD<br>N=182 | UPA 15 mg<br>QD<br>N=1340 | UPA 30 mg<br>QD<br>N=1353 |
| COVID-19 Infection                | 190 (5.9)                 | 32 (5.5)                  | 11 (3.5)      | 93 (10.3)                | 37 (8.6)                  | 3 (1.6)                  | 72 (5.4)                  | 88 (6.5)                  |
| Serious                           | 54 (28.4)                 | 5 (15.6)                  | 1 (9.1)       | 29 (31.2)                | 4 (10.8)                  | 0                        | 6 (8.3)                   | 13 (14.8)                 |
| Fatal                             | 8 (4.2)                   | 0                         | 0             | 6 (6.5)                  | 0                         | 0                        | 0                         | 2 (2.3)                   |
| Age at baseline (years)           |                           |                           |               |                          |                           |                          |                           |                           |
| Mean (SD)                         | 51.4 (11.75)              | 48.9 (10.39)              | 52.5 (12.35)  | 49.6 (9.84)              | 51.4 (11.41)              | 37.7 (12.74)             | 29.1 (13.05)              | 35.1 (16.58)              |
| Median (min,max)                  | 51.0 (20, 82)             | 49.5 (21, 63)             | 58.0 (29, 68) | 49.0 (25, 70)            | 50.0 (33, 72)             | 44.0 (23, 46)            | 25.5 (12, 67)             | 32.0 (13, 72)             |
| Geographic Region                 |                           |                           |               |                          |                           |                          |                           |                           |
| North America                     | 39 (20.5)                 | 6 (18.8)                  | 2 (18.2)      | 11 (11.8)                | 6 (16.2)                  | 0                        | 20 (27.8)                 | 41 (46.6)                 |
| South/Central America             | 53 (27.9)                 | 8 (25.0)                  | 6 (54.5)      | 24 (25.8)                | 3 (8.1)                   | 0                        | 4 (5.6)                   | 4 (4.5)                   |
| Western Europe                    | 11 (5.8)                  | 0                         | 0             | 3 (3.2)                  | 2 (5.4)                   | 3 (100)                  | 23 (31.9)                 | 21 (23.9)                 |
| Eastern Europe                    | 78 (41.1)                 | 17 (53.1)                 | 3 (27.3)      | 50 (53.8)                | 25 (67.6)                 | 0                        | 23 (31.9)                 | 21 (23.9)                 |
| Asia                              | 0                         | 0                         | 0             | 0                        | 0                         | 0                        | 0                         | 1 (1.1)                   |
| Other                             | 9 (4.7)                   | 1 (3.1)                   | 0             | 5 (5.4)                  | 1 (2.7)                   | 0                        | 2 (2.8)                   | 0                         |
| Severity                          |                           |                           |               |                          |                           |                          |                           |                           |
| Mild                              | 77 (40.5)                 | 9 (28.1)                  | 4 (36.4)      | 22 (23.7)                | 12 (32.4)                 | 1 (33.3)                 | 40 (55.6)                 | 42 (47.7)                 |
| Moderate                          | 78 (41.1)                 | 19 (59.4)                 | 7 (63.6)      | 46 (49.5)                | 23 (62.2)                 | 2 (66.7)                 | 25 (34.7)                 | 31 (35.2)                 |
| Severe                            | 35 (18.4)                 | 4 (12.5)                  | 0             | 24 (25.8)                | 2 (5.4)                   | 0                        | 7 (9.7)                   | 15 (17.0)                 |
| Unknown                           | 0                         | 0                         | 0             | 1 (1.1)                  | 0                         | 0                        | 0                         | 0                         |
| Resultant hospitalization         |                           |                           |               |                          |                           |                          |                           |                           |
| Yes                               | 51 (26.8)                 | 5 (15.6)                  | 1 (9.1)       | 28 (30.1)                | 4 (10.8)                  | 0                        | 6 (8.3)                   | 12 (13.6)                 |
| No                                | 22 (11.6)                 | 2 (6.3)                   | 0             | 4 (4.3)                  | 4 (10.8)                  | 0                        | 0                         | 1 (1.1)                   |
| Missing                           | 117 (61.6)                | 25 (78.1)                 | 10 (90.9)     | 61 (65.6)                | 29 (78.4)                 | 3 (100)                  | 66 (91.7)                 | 75 (85.2)                 |
| Action with study drug            |                           |                           |               |                          |                           |                          |                           |                           |
| Dose not changed                  | 49 (25.8)                 | 13 (40.6)                 | 6 (54.5)      | 22 (23.7)                | 12 (32.4)                 | 1 (33.3)                 | 30 (41.7)                 | 39 (44.3)                 |
| Drug interrupted                  | 132 (69.5)                | 18 (56.3)                 | 5 (45.5)      | 63 (67.7)                | 25 (67.6)                 | 2 (66.7)                 | 40 (55.6)                 | 44 (50.0)                 |
| Drug withdrawn                    | 9 (4.7)                   | 1 (3.1)                   | 0             | 7 (7.5)                  | 0                         | 0                        | 1 (1.4)                   | 3 (3.4)                   |
| Multiple (interrupted, withdrawn) | 0                         | 0                         | 0             | 0                        | 0                         | 0                        | 0                         | 0                         |
| Missing                           | 0                         | 0                         | 0             | 1 (1.1)                  | 0                         | 0                        | 1 (1.4)                   | 2 (2.3)                   |

AD, atopic dermatitis; ADA, adalimumab; AS, ankylosing spondylitis; EOW, every other week; MTX, methotrexate; PsA, psoriatic arthritis; QD, once daily; RA, rheumatoid arthritis; UPA, upadacitinib.



**Online Supplemental Table S5** Summary of opportunistic infections excluding tuberculosis and herpes zoster with upadacitinib by decreasing number of events

|                        |                                                                                                                                                                                                                                                                                                                                                                                       |
|------------------------|---------------------------------------------------------------------------------------------------------------------------------------------------------------------------------------------------------------------------------------------------------------------------------------------------------------------------------------------------------------------------------------|
| Rheumatoid arthritis   | Esophageal candidiasis (8), oral fungal infection (4), oropharyngeal candidiasis (4), bronchopulmonary aspergillosis (3), coccidioidomycosis (1), cytomegalovirus infection (1), eczema herpeticum (1), fungal pharyngitis (1), gastrointestinal candidiasis (1), meningitis listeria (1), pneumocystis jiroveci pneumonia (1), pneumonia cryptococcal (1), sinusitis aspergillus (1) |
| Psoriatic arthritis    | Esophageal candidiasis (2), oral fungal infection (2), bronchopulmonary aspergillosis (1), candida urethritis (1), coccidioidomycosis (1), oropharyngeal candidiasis (1), respiratory moniliasis (1)                                                                                                                                                                                  |
| Ankylosing spondylitis | Esophageal candidiasis (2)                                                                                                                                                                                                                                                                                                                                                            |
| Atopic dermatitis      | UPA 15 mg: eczema herpeticum (29), Kaposi's varicelliform eruption (6), strongyloidiasis (1)<br>UPA 30 mg: eczema herpeticum (33), Kaposi's varicelliform eruption (17), esophageal candidiasis (1), oral fungal infection (1)                                                                                                                                                        |

UPA, upadacitinib.

**Online Supplemental Table S6.** Summary of extent of involvement for patients with treatment-emergent herpes zoster who are receiving upadacitinib

| Characteristics         | RA<br>n=232 | PsA<br>n=61 | AS<br>n=4   | AD<br>UPA 15 mg<br>n=59 | AD<br>UPA 30 mg<br>n=110 |
|-------------------------|-------------|-------------|-------------|-------------------------|--------------------------|
| Age                     |             |             |             |                         |                          |
| Mean (SD)               | 57.7 (11.7) | 54.7 (10.4) | 52.5 (11.5) | 34.2 (14.0)             | 35 (14.6)                |
| ≥65 years               | 65 (28.0)   | 9 (14.8)    | 1 (25.0)    | 3 (5.1)                 | 3 (2.7)                  |
| History of HZ event     | 18 (7.8)    | 0           | 2 (50.0)    | 6 (10.2)                | 11 (10.0)                |
| Previous HZ vaccination | 11 (4.7)    | 5 (8.3)     | 0           | 3 (5.1)                 | 7 (6.4)                  |
| Geographic region       |             |             |             |                         |                          |
| North America           | 58 (25.0)   | 19 (31.1)   | 0           | 17 (28.8)               | 23 (20.9)                |
| South/Central America   | 45 (19.4)   | 6 (9.8)     | 0           | 0                       | 5 (4.5)                  |
| Western Europe          | 21 (9.1)    | 7 (11.5)    | 0           | 18 (30.5)               | 38 (34.5)                |
| Eastern Europe          | 56 (24.1)   | 15 (24.6)   | 1 (25.0)    | 6 (10.2)                | 10 (9.1)                 |
| Asia                    | 39 (16.8)   | 11 (18.0)   | 3 (75.0)    | 15 (25.4)               | 23 (20.9)                |
| Other                   | 13 (5.6)    | 3 (4.9)     | 0           | 3 (5.1)                 | 11 (10.0)                |
| Extent of involvement   |             |             |             |                         |                          |
| One dermatome           | 177 (76.3)  | 41 (67.2)   | 4 (100)     | 46 (78.0)               | 74 (67.3)                |
| Ophthalmic              | 15 (6.5)    | 3 (4.9)     | 0           | 1 (1.7)                 | 3 (2.7)                  |
| Characteristics         | RA<br>n=231 | PsA<br>n=61 | AS<br>n=4   | AD<br>UPA 15 mg<br>n=59 | AD<br>UPA 30 mg<br>n=110 |

|                               |         |         |   |   |         |
|-------------------------------|---------|---------|---|---|---------|
| Oticus (Ramsay Hunt Syndrome) | 2 (0.9) | 1 (1.6) | 0 | 0 | 3 (2.7) |
| CNS                           | 0       | 0       | 0 | 0 | 0       |

Data are presented as n (%) unless otherwise specified.  
AD, atopic dermatitis; AS, ankylosing spondylitis; CNS, central nervous system; HZ, herpes zoster; PsA, psoriatic arthritis; RA, rheumatoid arthritis, UPA, upadacitinib.

**Online Supplemental Table S7** Summary of malignancies in patients receiving upadacitinib by decreasing number of events

|                      |                                                                                                                                                                                                                                                                                                                                                                                                                                                                                                                                                                                                                                                                                                                                                                                                                                                                                                                                                                                                                                                                                                                                                                                                                                                                                                                                                                                                                                                                                                                                                                                                                                                                                                                                                                                                                                                                                                                                                                      |
|----------------------|----------------------------------------------------------------------------------------------------------------------------------------------------------------------------------------------------------------------------------------------------------------------------------------------------------------------------------------------------------------------------------------------------------------------------------------------------------------------------------------------------------------------------------------------------------------------------------------------------------------------------------------------------------------------------------------------------------------------------------------------------------------------------------------------------------------------------------------------------------------------------------------------------------------------------------------------------------------------------------------------------------------------------------------------------------------------------------------------------------------------------------------------------------------------------------------------------------------------------------------------------------------------------------------------------------------------------------------------------------------------------------------------------------------------------------------------------------------------------------------------------------------------------------------------------------------------------------------------------------------------------------------------------------------------------------------------------------------------------------------------------------------------------------------------------------------------------------------------------------------------------------------------------------------------------------------------------------------------|
| Rheumatoid arthritis | <p><b>Skin – 40</b> (basal cell carcinoma [19], squamous cell carcinoma of the skin [12], malignant melanoma [4], Bowen’s disease [1], malignant melanoma in situ [1], malignant melanoma stage III [1], sebaceous carcinoma [1], skin cancer [1]); <b>Gastrointestinal – 13</b> (rectal adenocarcinoma [2], adenocarcinoma gastric [1], adenocarcinoma of colon [1], adenocarcinoma pancreas [1], colon cancer metastatic [1], gastric cancer [1], intestinal metastasis [1], malignant palate neoplasm [1], pancreatic carcinoma stage IV [1], rectal cancer [1], squamous cell carcinoma of the oral cavity [1], tongue neoplasm malignant stage unspecified [1]); <b>Respiratory – 12</b> (lung adenocarcinoma [4], squamous cell carcinoma of lung [3], lung carcinoma cell type unspecified stage IV [2], laryngeal cancer [1], lung neoplasm malignant [1], non-small cell lung cancer [1]); <b>Breast – 11</b> (breast cancer [7], invasive ductal carcinoma [3], intraductal proliferative breast lesion [1]); <b>Renal and urinary tract – 6</b> (bladder cancer [3], bladder transitional cell carcinoma [1], clear cell renal cell carcinoma [1], renal cancer stage I [1]); <b>Reproductive – 6</b> (endometrial adenocarcinoma [2], Paget’s disease of nipple [1], prostate cancer [1], squamous cell carcinoma of vulva [1], uterine carcinoma in situ [1]); <b>Unknown origin – 4</b> (adenocarcinoma [1], malignant neoplasm of unknown primary site [1], metastatic squamous cell carcinoma [1], squamous cell carcinoma [1]); <b>Endocrine – 3</b> (papillary thyroid cancer [2], neuroendocrine carcinoma of the skin [1]); <b>Lymphoma – 3</b> (cutaneous T-cell lymphoma [1], Non-Hodgkin’s lymphoma [1], Non-Hodgkin’s lymphoma stage IV [1]); <b>Blood – 1</b> (acute promyelocytic leukemia); <b>Hepatobiliary – 1</b> (metastasis to liver); <b>Musculoskeletal – 1</b> (myxoid liposarcoma); <b>Nervous system – 1</b> (glioblastoma)</p> |
| Psoriatic arthritis  | <p><b>Skin – 17</b> (basal cell carcinoma [8], squamous cell carcinoma of the skin [7], malignant melanoma [1], malignant melanoma stage III [1]); <b>Reproductive – 4</b> (prostate cancer [2], endometrial adenocarcinoma [1], ovarian cancer [1]); <b>Respiratory – 2</b> (lung adenocarcinoma [1], lung cancer metastatic [1]);</p>                                                                                                                                                                                                                                                                                                                                                                                                                                                                                                                                                                                                                                                                                                                                                                                                                                                                                                                                                                                                                                                                                                                                                                                                                                                                                                                                                                                                                                                                                                                                                                                                                              |



**Gastrointestinal – 1** (rectal cancer); **Endocrine – 1** (neuroendocrine carcinoma); **Renal and urinary tract – 1** (bladder transitional cell carcinoma)

Ankylosing spondylitis    **Gastrointestinal – 1** (Squamous cell carcinoma of the tongue)

|                   |                                                                                                                                                                                                                                                                                                                                                                                                                                                                                                                                                                                                                                                                                                                                                                                                                                                                                                                      |
|-------------------|----------------------------------------------------------------------------------------------------------------------------------------------------------------------------------------------------------------------------------------------------------------------------------------------------------------------------------------------------------------------------------------------------------------------------------------------------------------------------------------------------------------------------------------------------------------------------------------------------------------------------------------------------------------------------------------------------------------------------------------------------------------------------------------------------------------------------------------------------------------------------------------------------------------------|
| Atopic dermatitis | <p>UPA 15 mg: <b>Skin – 7</b> (squamous cell carcinoma of the skin [3], basal cell carcinoma [1], Bowen’s disease [1], keratoacanthoma [1], skin cancer [1]); <b>Gastrointestinal – 3</b> (colon cancer [1], anal squamous cell carcinoma [1], gastric cancer [1]); <b>Breast – 1</b> (breast cancer)</p> <p>UPA 30 mg: <b>Skin – 8</b> (squamous cell carcinoma of the skin [5], basal cell carcinoma [1], keratoacanthoma [1], malignant melanoma in situ [1]); <b>Gastrointestinal – 3</b> (adenocarcinoma of colon [1], anal squamous cell carcinoma [1], gastric cancer [1]); <b>Renal and urinary tract – 2</b> (bladder transitional cell carcinoma [1], clear cell renal cell carcinoma [1]); <b>Breast – 1</b> (invasive ductal breast carcinoma); <b>Endocrine – 1</b> (thyroid cancer); <b>Lymphoma – 1</b> (cutaneous T-cell lymphoma stage I); <b>Reproductive – 1</b> (endometrial adenocarcinoma)</p> |
|-------------------|----------------------------------------------------------------------------------------------------------------------------------------------------------------------------------------------------------------------------------------------------------------------------------------------------------------------------------------------------------------------------------------------------------------------------------------------------------------------------------------------------------------------------------------------------------------------------------------------------------------------------------------------------------------------------------------------------------------------------------------------------------------------------------------------------------------------------------------------------------------------------------------------------------------------|

**Online Supplemental Table S8.** Laboratory changes in RA\*

| Variable (unit)<br>Criteria          | UPA 15 mg QD<br>n = 3209 | RA                       |                |
|--------------------------------------|--------------------------|--------------------------|----------------|
|                                      |                          | ADA 40 mg EOW<br>n = 579 | MTX<br>n = 314 |
| Hemoglobin (G/L)                     |                          |                          |                |
| Grade 2 (decreased 15-<21)           | 14.9% (478/3201)         | 8.3% (48/576)            | 13.8% (43/312) |
| Grade 3 (70-<80 or decreased 21-<30) | 8.8% (281/3201)          | 6.1% (35/576)            | 9.3% (29/312)  |
| Grade 4 (<70 or decreased ≥30)       | 4.0% (128/3201)          | 4.0% (23/576)            | 6.7% (21/312)  |
| Platelets (10 <sup>9</sup> /L)       |                          |                          |                |
| Grade 2 (50-<75)                     | 0.4% (12/3197)           | 0.5% (3/576)             | 0.3% (1/311)   |
| Grade 3 (20-<50)                     | <0.1% (1/3197)           | 0                        | 0              |
| Grade 4 (<20)                        | 0.4% (13/3197)           | 0.5% (3/576)             | 0.3% (1/311)   |
| Leukocytes (10 <sup>9</sup> /L)      |                          |                          |                |
| Grade 2 (2.0-<3.0)                   | 5.6% (180/3201)          | 0.7% (4/576)             | 5.4% (17/312)  |
| Grade 3 (1.0-<2.0)                   | 0.4% (12/3201)           | 0.5% (3/576)             | 0              |
| Grade 4 (<1.0)                       | 0.7% (23/3201)           | 0.5% (3/576)             | 0.3% (1/312)   |
| Neutrophils (10 <sup>9</sup> /L)     |                          |                          |                |
| Grade 2 (1.0-<1.5)                   | 7.7% (248/3201)          | 5.2% (30/576)            | 3.5% (11/312)  |
| Grade 3 (0.5-<1.0)                   | 1.5% (47/3201)           | 0.7% (4/576)             | 1.3% (4/312)   |
| Grade 4 (<0.5)                       | 0.5% (16/3201)           | 0.2% (1/576)             | 0.3% (1/312)   |
| Lymphocytes (10 <sup>9</sup> /L)     |                          |                          |                |
| Grade 2 (1.0-<1.5)                   | 31.2% (998/3201)         | 19.3% (111/576)          | 28.5% (89/312) |
| Grade 3 (0.5-<1.0)                   | 28.5% (911/3201)         | 10.9% (63/576)           | 27.2% (85/312) |
| Grade 4 (<0.5)                       | 3.2% (102/3201)          | 1.2% (7/576)             | 2.2% (7/312)   |
| Alanine aminotransferase (U/L)       |                          |                          |                |
| Grade 2 (1.5-<3.0 x ULN)             | 18.9% (606/3199)         | 14.0% (81/577)           | 16.7% (52/312) |
| Grade 3 (3.0-<8.0 x ULN)             | 5.3% (169/3199)          | 2.6% (15/577)            | 8.3% (26/312)  |
| Grade 4 (>8.0 x ULN)                 | 1.0% (32/3199)           | 0.7% (4/577)             | 2.2% (7/312)   |
| Aspartate aminotransferase (U/L)     |                          |                          |                |
| Grade 2 (1.5-<3.0 x ULN)             | 14.9% (478/3199)         | 9.5% (55/577)            | 13.1% (41/312) |
| Grade 3 (3.0-<8.0 x ULN)             | 3.5% (113/3199)          | 1.9% (11/577)            | 5.1% (16/312)  |
| Grade 4 (>8.0 x ULN)                 | 0.7% (22/3199)           | 0.9% (5/577)             | 0.6% (2/312)   |
| Bilirubin (μmol/L)                   |                          |                          |                |
| Grade 2 (1.4-<1.9 x ULN)             | 1.3% (42/3199)           | 0.7% (4/577)             | 1.9% (6/312)   |
| Grade 3 (1.9-<3.0 x ULN)             | 0.3% (9/3199)            | 0.5% (3/577)             | 0              |
| Grade 4 (>3.0 x ULN)                 | 0.2% (6/3199)            | 0.2% (1/577)             | 0.6% (2/312)   |
| Creatine kinase (U/L)                |                          |                          |                |
| Grade 2 (<2.5-5.0 x ULN)             | 9.2% (295/3199)          | 4.0% (23/577)            | 3.2% (10/312)  |
| Grade 3 (>5.0-10.0 x ULN)            | 2.3% (72/3199)           | 0.9% (5/577)             | 0.6% (2/312)   |
| Grade 4 (>10.0 x ULN)                | 0.8% (27/3199)           | 0.5% (3/577)             | 0              |
| Creatinine (μmol/L)                  |                          |                          |                |

| Variable (unit)<br>Criteria | RA                       |                          |                |
|-----------------------------|--------------------------|--------------------------|----------------|
|                             | UPA 15 mg QD<br>n = 3209 | ADA 40 mg EOW<br>n = 579 | MTX<br>n = 314 |
| Grade 2 (>1.5-3.0 x ULN)    | 0.9% (30/3199)           | 1.0% (6/577)             | 1.6% (5/312)   |
| Grade 3 (>3.0-6.0 x ULN)    | <0.1% (3/3199)           | 0.3% (2/577)             | 0              |
| Grade 4 (>6.0 x ULN)        | 0.2% (5/3199)            | 0.2% (1/577)             | 0.6% (2/312)   |

\*Toxicity grading scales are based on OMERACT criteria, with the exception of creatine kinase and creatinine, which are based on NCI CTCAE.

ADA, adalimumab; CTCAE, common terminology criteria for adverse events; EOW, every other week; MTX, methotrexate; NCI, National Cancer Institute; OMERACT, Outcome Measures in Rheumatologic Clinical Trials; QD, once daily; RA, rheumatoid arthritis, UPA, upadacitinib.

**Online Supplemental Table S9.** Laboratory changes in PsA, AS and AD\*

| Variable (unit)<br>Criteria                  | PsA                     |                          | AS                   |                       | AD                       |  |
|----------------------------------------------|-------------------------|--------------------------|----------------------|-----------------------|--------------------------|--|
|                                              | UPA 15 mg QD<br>n = 907 | ADA 40 mg EOW<br>n = 429 | UPA 15 mg<br>n = 182 | UPA 15 mg<br>n = 1340 | UPA 30 mg QD<br>n = 1353 |  |
| Hemoglobin (G/L)                             |                         |                          |                      |                       |                          |  |
| Grade 2 (80-<100)                            | 2.6% (23/901)           | 1.6% (7/427)             | 2.7% (5/182)         | 0.7% (9/1333)         | 1.9% (25/1349)           |  |
| Grade 3 (<80)                                | 0.4% (4/901)            | 0.2% (1/427)             | 0                    | <0.1% (1/1333)        | 0.6% (8/1349)            |  |
| Platelets (10 <sup>9</sup> /L)               |                         |                          |                      |                       |                          |  |
| Grade 2 (50-<75)                             | 0.3% (3/901)            | 0                        | 0                    | <0.1% (1/1333)        | 0.3% (4/1349)            |  |
| Grade 3 (25-<50)                             | 0.1% (1/901)            | 0                        | 0                    | 0                     | 0.1% (2/1349)            |  |
| Grade 4 (<25)                                | 0.1% (1/901)            | 0                        | 0                    | 0                     | 0                        |  |
| Leukocytes (10 <sup>9</sup> /L)              |                         |                          |                      |                       |                          |  |
| Grade 2 (2.0-<3.0)                           | 6.3% (57/901)           | 2.3% (10/427)            | 4.4% (8/182)         | 3.2% (42/1333)        | 5.7% (77/1349)           |  |
| Grade 3 (1.0-<2.0)                           | 0.1% (1/901)            | 0                        | 0.5% (1/182)         | 0                     | 0.2% (3/1349)            |  |
| Grade 4 (<1.0)                               | 0                       | 0                        | 0                    | 0                     | <0.1% (1/1349)           |  |
| Neutrophils (10 <sup>9</sup> /L)             |                         |                          |                      |                       |                          |  |
| Grade 2 (1.0-<1.5)                           | 6.0% (54/901)           | 4.9% (21/426)            | 6.6% (12/182)        | 7.9% (105/1333)       | 13.3% (179/1349)         |  |
| Grade 3 (0.5-<1.0)                           | 0.8% (7/901)            | 0.9% (4/426)             | 1.6% (3/182)         | 1.1% (14/1333)        | 1.9% (26/1349)           |  |
| Grade 4 (<0.5)                               | 0.1% (1/901)            | 0                        | 0                    | <0.1% (1/1333)        | 0.1% (2/1349)            |  |
| Lymphocytes (10 <sup>9</sup> /L)             |                         |                          |                      |                       |                          |  |
| Grade 2 (0.5-<0.8)                           | 13.1% (118/901)         | 2.1% (9/426)             | 4.9% (9/182)         | 6.6% (88/1333)        | 9.1% (123/1349)          |  |
| Grade 3 (0.2-<0.5)                           | 2.6% (23/901)           | 0                        | 0                    | 0.7% (9/1333)         | 1.6% (22/1349)           |  |
| Grade 4 (<0.2)                               | 0.2% (2/901)            | 0                        | 0                    | 0                     | <0.1% (1/1349)           |  |
| Alanine aminotransferase (U/L)               |                         |                          |                      |                       |                          |  |
| Grade 2 (>3.0-5.0 x ULN)                     | 5.5% (50/901)           | 6.8% (29/427)            | 1.6% (3/182)         | 2.9% (39/1333)        | 3.8% (51/1349)           |  |
| Grade 3 (>5.0-20.0 x ULN)                    | 1.6% (14/901)           | 2.6% (11/427)            | 1.1% (2/182)         | 0.5% (6/1333)         | 0.8% (11/1349)           |  |
| Grade 4 (>20.0 x ULN)                        | 0.2% (2/901)            | 0                        | 0                    | <0.1% (1/1333)        | <0.1% (1/1349)           |  |
| Aspartate aminotransferase (U/L)             |                         |                          |                      |                       |                          |  |
| Grade 2 (>3.0-5.0 x ULN)                     | 3.0% (27/901)           | 4.0% (17/426)            | 2.7% (5/182)         | 1.9% (25/1332)        | 3.4% (46/1349)           |  |
| Grade 3 (>5.0-20.0 x ULN)                    | 1.2% (11/901)           | 1.6% (7/426)             | 1.1% (2/182)         | 0.8% (10/1332)        | 1.3% (17/1349)           |  |
| Grade 4 (>20.0 x ULN)                        | 0                       | 0                        | 0.5% (1/182)         | 0.2% (2/1332)         | 0.1% (2/1349)            |  |
| Bilirubin (μmol/L)                           |                         |                          |                      |                       |                          |  |
| Grade 2 (>1.5-3.0 x ULN)                     | 1.7% (15/901)           | 2.3% (10/426)            | 2.2% (4/182)         | 3.8% (50/1333)        | 4.1% (55/1349)           |  |
| Grade 3 (>3.0-10.0 x ULN)                    | 0.1% (1/901)            | 0.2% (1/426)             | 0                    | 0.2% (2/1333)         | 0.3% (4/1349)            |  |
| Grade 4 (>10.0 x ULN)                        | 0                       | 0                        | 0                    | 0                     | 0                        |  |
| Creatine kinase (U/L)                        |                         |                          |                      |                       |                          |  |
| Grade 2 (>2.5-5.0 x ULN)                     | 11.5% (104/901)         | 5.4% (23/426)            | 17.6% (32/182)       | 14.4% (192/1333)      | 21.8% (294/1350)         |  |
| Grade 3 (>5.0-10.0 x ULN)                    | 2.3% (21/901)           | 0.9% (4/426)             | 4.9% (9/182)         | 5.5% (73/1333)        | 8.0% (108/1350)          |  |
| Grade 4 (>10.0 x ULN)                        | 1.1% (10/901)           | 1.4% (6/426)             | 2.7% (5/182)         | 2.3% (30/1333)        | 3.6% (49/1350)           |  |
| Creatinine (μmol/L)                          |                         |                          |                      |                       |                          |  |
| Grade 2 (>1.5-3.0 x ULN or<br>>1.5-3.0 x BL) | 7.3% (66/901)           | 6.8% (29/427)            | 4.9% (9/182)         | 3.1% (42/1334)        | 4.1% (56/1350)           |  |

| Variable (unit)<br>Criteria                                                                                                                                                                                                                                                                                                                 | PsA                     |                          | AS                   | AD                    |                          |
|---------------------------------------------------------------------------------------------------------------------------------------------------------------------------------------------------------------------------------------------------------------------------------------------------------------------------------------------|-------------------------|--------------------------|----------------------|-----------------------|--------------------------|
|                                                                                                                                                                                                                                                                                                                                             | UPA 15 mg QD<br>n = 907 | ADA 40 mg EOW<br>n = 429 | UPA 15 mg<br>n = 182 | UPA 15 mg<br>n = 1340 | UPA 30 mg QD<br>n = 1353 |
| Grade 3 (>3.0-6.0 x ULN or >3.0 x BL)                                                                                                                                                                                                                                                                                                       | 0.3% (3/901)            | 0.2% (1/427)             | 0                    | 0.3% (4/1334)         | 0.4% (5/1350)            |
| Grade 4 (>6.0 x ULN)                                                                                                                                                                                                                                                                                                                        | 0.1% (1/901)            | 0.2% (1/427)             | 0                    | 0.2% (3/1334)         | <0.1% (1/1350)           |
| *Toxicity grading scales are based on NCI CTCAE<br>AD, atopic dermatitis; ADA, adalimumab; AS, ankylosing spondylitis; BL, baseline; CTCAE, common terminology criteria for adverse events; EOW, every other week; NCI, National Cancer Institute; PsA, psoriatic arthritis; QD, once daily; ULN, upper limit of normal; UPA, upadacitinib. |                         |                          |                      |                       |                          |

Online Supplemental Table S10 TEAEs of special interest with upadacitinib stratified by age

| RA                           |                      |                     |                     | PsA                |                     |                    |                      | AS                 |                      |                    |                     | AD                  |                      |                    |                      |                      |
|------------------------------|----------------------|---------------------|---------------------|--------------------|---------------------|--------------------|----------------------|--------------------|----------------------|--------------------|---------------------|---------------------|----------------------|--------------------|----------------------|----------------------|
| Event, E/100 PY<br>(95% CI)  | UPA<br>15 mg         |                     | ADA<br>40 mg        |                    | MTX                 |                    | UPA<br>15 mg         |                    | ADA<br>40 mg         |                    | UPA<br>15 mg        |                     | UPA<br>15 mg         |                    | UPA<br>30 mg         |                      |
|                              | <65 yo               | ≥65 yo              | <65 yo              | ≥65 yo             | <65 yo              | ≥65 yo             | <65 yo               | ≥65 yo             | <65 yo               | ≥65 yo             | <65 yo              | ≥65 yo              | <65 yo               | ≥65 yo             | <65 yo               | ≥65 yo               |
|                              | n=2566<br>PYs=7444.4 | n=643<br>PYs=1634.7 | n=473<br>PYs=1093.1 | n=106<br>PYs=214.7 | n=256<br>PYs=630.4  | n=58<br>PYs=151.4  | n=778<br>PYs=1622.1  | n=129<br>PYs=250.2 | n=362<br>PYs=764.1   | n=67<br>PYs=139.6  | n=171<br>PYs=299.4  | n=11<br>PYs=20.7    | n=1292<br>PYs=1970.2 | n=48<br>PYs=65.6   | n=1285<br>PYs=2015.2 | n=68<br>PYs=102.7    |
| Serious infection            | 3.1<br>(2.7, 3.5)    | 5.1<br>(4.1, 6.4)   | 3.4<br>(2.4, 4.7)   | 4.2<br>(1.9, 8.0)  | 1.3<br>(0.5, 2.5)   | 5.3<br>(2.3, 10.4) | 3.6<br>(2.8, 4.7)    | 5.6<br>(3.1, 9.4)  | 1.0<br>(0.5, 2.1)    | 3.6<br>(1.2, 8.4)  | 0.0                 | 0.0                 | 2.5<br>(1.8, 3.3)    | 1.5<br>(0.0, 8.5)  | 2.7<br>(2.0, 3.5)    | 9.7<br>(4.7, 17.9)   |
| Opportunistic infection      | 0.3<br>(0.2, 0.4)    | 0.4<br>(0.1, 0.8)   | 0.2<br>(0.0, 0.7)   | 0.0<br>(0.0, 1.7)  | 0.0<br>(0.0, 0.6)   | 0.7<br>(0.0, 3.7)  | 0.6<br>(0.3, 1.1)    | 0.0<br>(0.0, 1.5)  | 0.0<br>(0.0, 0.5)    | 0.0<br>(0.0, 2.6)  | 0.7<br>(0.1, 2.4)   | 0.0                 | 1.8<br>(1.3, 2.5)    | 0.0                | 2.5<br>(1.9, 3.3)    | 1.0<br>(0.0, 5.4)    |
| Malignancy excluding NMSC    | 0.5<br>(0.3, 0.7)    | 1.8<br>(1.2, 2.5)   | 0.5<br>(0.2, 1.2)   | 2.8<br>(1.0, 6.1)  | 1.0<br>(0.3, 2.1)   | 1.3<br>(0.2, 4.8)  | 0.3<br>(0.1, 0.7)    | 2.4<br>(0.9, 5.2)  | 0.3<br>(0.0, 0.9)    | 1.4<br>(0.2, 5.2)  | 0.3<br>(0.0, 1.9)   | 0.0                 | 0.2<br>(0.1, 0.5)    | 0.0                | 0.3<br>(0.1, 0.6)    | 2.9<br>(0.6, 8.5)    |
| NMSC                         | 0.2<br>(0.1, 0.3)    | 1.3<br>(0.8, 2.0)   | 0.0<br>(0.0, 0.3)   | 0.5<br>(0.0, 2.6)  | 0.0<br>(0.0, 0.6)   | 0.0<br>(0.0, 2.4)  | 0.4<br>(0.2, 0.9)    | 3.2<br>(1.4, 6.3)  | 0.3<br>(0.0, 0.9)    | 0.0<br>(0, 2.6)    | 0.0                 | 0.0                 | 0.4<br>(0.1, 0.7)    | 0.0                | 0.3<br>(0.1, 0.7)    | 1.0<br>(0.0, 5.4)    |
| Hepatic disorder             | 10.5<br>(9.8, 11.3)  | 8.5<br>(7.1, 10.0)  | 8.6<br>(6.9, 10.5)  | 2.8<br>(1.0, 6.1)  | 12.5<br>(9.9, 15.6) | 5.9<br>(2.7, 11.3) | 13.7<br>(11.9, 15.6) | 9.6<br>(6.1, 14.3) | 21.3<br>(18.2, 24.9) | 7.2<br>(3.4, 13.2) | 9.7<br>(6.5, 13.9)  | 14.5<br>(3.0, 42.4) | 5.5<br>(4.5, 6.7)    | 1.5<br>(0.0, 8.5)  | 7.3<br>(6.2, 8.6)    | 4.9<br>(1.6, 11.4)   |
| GI perforation (adjudicated) | <0.1<br>(0.0, 0.1)   | <0.1<br>(0.0, 0.3)  | 0.0<br>(0.0, 0.3)   | 0.0<br>(0.0, 1.7)  | 0.0<br>(0.0, 0.6)   | 0.0<br>(0.0, 2.4)  | 0.0<br>(0.0, 0.2)    | 0.8<br>(0.1, 2.9)  | 0.0<br>(0.0, 0.5)    | 0.0<br>(0.0, 2.6)  | 0.0                 | 0.0                 | 0.0                  | 0.0                | 0.0                  | 0.0                  |
| Anemia                       | 2.6<br>(2.2, 2.9)    | 5.2<br>(4.2, 6.4)   | 3.4<br>(2.4, 4.7)   | 3.3<br>(1.3, 6.7)  | 3.6<br>(2.3, 5.5)   | 3.3<br>(1.1, 1.7)  | 2.5<br>(1.8, 3.4)    | 1.6<br>(0.4, 4.1)  | 1.7<br>(0.9, 2.9)    | 5.0<br>(2.0, 10.3) | 1.7<br>(0.5, 3.9)   | 0.0                 | 1.5<br>(1.0, 2.2)    | 7.6<br>(2.5, 17.8) | 1.7<br>(1.2, 2.4)    | 19.5<br>(11.9, 30.1) |
| Neutropenia                  | 2.2<br>(1.9, 2.6)    | 1.9<br>(1.3, 2.7)   | 1.7<br>(1.0, 2.7)   | 3.3<br>(1.3, 6.7)  | 1.6<br>(0.8, 2.9)   | 2.0<br>(0.4, 5.8)  | 2.0<br>(1.4, 2.9)    | 0.4<br>(0.0, 2.2)  | 4.2<br>(2.9, 5.9)    | 1.4<br>(0.2, 5.2)  | 3.0<br>(1.4, 5.7)   | 0.0                 | 1.6<br>(1.1, 2.2)    | 1.5<br>(0.0, 8.5)  | 2.9<br>(2.2, 3.8)    | 2.9<br>(0.6, 8.5)    |
| Lymphopenia                  | 1.6<br>(1.3, 1.9)    | 1.8<br>(1.2, 2.6)   | 0.7<br>(0.3, 1.4)   | 1.9<br>(0.5, 4.8)  | 3.6<br>(2.3, 5.5)   | 1.3<br>(0.2, 4.8)  | 2.3<br>(1.7, 3.2)    | 2.8<br>(1.1, 5.8)  | 0.3<br>(0.0, 0.9)    | 0.0<br>(0.0, 2.6)  | 0.3<br>(0.0, 1.9)   | 9.7<br>(1.2, 34.9)  | 0.6<br>(0.3, 1.0)    | 0.0                | 0.8<br>(0.5, 1.4)    | 1.9<br>(0.2, 7.0)    |
| Herpes zoster                | 2.5<br>(2.2, 2.9)    | 5.1<br>(4.0, 6.3)   | 1.1<br>(0.6, 1.9)   | 2.3<br>(0.8, 5.4)  | 0.8<br>(0.3, 1.9)   | 1.3<br>(0.2, 4.8)  | 3.6<br>(2.7, 4.6)    | 4.0<br>(1.9, 7.4)  | 0.5<br>(0.1, 1.3)    | 0.0<br>(0.0, 2.6)  | 1.3<br>(0.4, 3.4)   | 4.8<br>(0.1, 26.9)  | 3.0<br>(2.3, 3.9)    | 4.6<br>(0.9, 13.4) | 5.9<br>(4.8, 7.0)    | 2.9<br>(0.6, 8.5)    |
| Elevated CPK levels          | 4.5<br>(4.1, 5.0)    | 4.0<br>(3.1, 5.1)   | 1.9<br>(1.2, 2.9)   | 0.0<br>(0.0, 1.7)  | 1.4<br>(0.7, 2.7)   | 1.3<br>(0.2, 4.8)  | 8.3<br>(6.9, 9.8)    | 5.6<br>(3.1, 9.4)  | 5.9<br>(4.3, 7.9)    | 5.7<br>(2.5, 11.3) | 11.0<br>(7.6, 15.5) | 9.7<br>(1.2, 34.9)  | 7.0<br>(5.8, 8.2)    | 3.0<br>(0.4, 11.0) | 9.3<br>(8.0, 10.7)   | 4.9<br>(1.6, 11.4)   |

| Event, E/100 PY<br>(95% CI) | RA                   |                     |                     |                    | PsA                |                   |                     |                    | AS                 |                   |                    |                  | AD                   |                   |                      |                   |
|-----------------------------|----------------------|---------------------|---------------------|--------------------|--------------------|-------------------|---------------------|--------------------|--------------------|-------------------|--------------------|------------------|----------------------|-------------------|----------------------|-------------------|
|                             | UPA<br>15 mg         |                     | ADA<br>40 mg        |                    | MTX                |                   | UPA<br>15 mg        |                    | ADA<br>40 mg       |                   | UPA<br>15 mg       |                  | UPA<br>15 mg         |                   | UPA<br>30 mg         |                   |
|                             | <65 yo               | ≥65 yo              | <65 yo              | ≥65 yo             | <65 yo             | ≥65 yo            | <65 yo              | ≥65 yo             | <65 yo             | ≥65 yo            | <65 yo             | ≥65 yo           | <65 yo               | ≥65 yo            | <65 yo               | ≥65 yo            |
|                             | n=2566<br>PYs=7444.4 | n=643<br>PYs=1634.7 | n=473<br>PYs=1093.1 | n=106<br>PYs=214.7 | n=256<br>PYs=630.4 | n=58<br>PYs=151.4 | n=778<br>PYs=1622.1 | n=129<br>PYs=250.2 | n=362<br>PYs=764.1 | n=67<br>PYs=139.6 | n=171<br>PYs=299.4 | n=11<br>PYs=20.7 | n=1292<br>PYs=1970.2 | n=48<br>PYs=65.6  | n=1285<br>PYs=2015.2 | n=68<br>PYs=102.7 |
| MACE<br>(adjudicated)       | 0.3<br>(0.2, 0.4)    | 1.0<br>(0.6, 1.7)   | 0.2<br>(0.0, 0.7)   | 0.9<br>(0.1, 3.4)  | 0.2<br>(0.0, 0.9)  | 0.7<br>(0.0, 3.7) | 0.2<br>(0.1, 0.6)   | 0.4<br>(0.0, 2.2)  | 0.3<br>(0.0, 0.9)  | 0.7<br>(0.0, 4.0) | 0.0                | 0.0              | 0.0                  | 1.5<br>(0.0, 8.5) | 0.0                  | 1.0<br>(0.0, 5.4) |
| VTE (adjudicated)           | 0.3<br>(0.2, 0.5)    | 0.7<br>(0.4, 1.3)   | 0.4<br>(0.1, 0.9)   | 0.5<br>(0.0, 2.6)  | 0.6<br>(0.2, 1.6)  | 0.0<br>(0.0, 2.4) | 0.2<br>(0.0, 0.5)   | 0.4<br>(0.0, 2.2)  | 0.3<br>(0.0, 0.9)  | 0.0<br>(0.0, 2.6) | 0.3<br>(0.0, 1.9)  | 0.0              | <0.1<br>(0.0, 0.3)   | 1.5<br>(0.0, 8.5) | 0.0                  | 1.0<br>(0.0, 5.4) |

AD, atopic dermatitis; ADA, adalimumab; AS, ankylosing spondylitis; CPK, creating phosphokinase; E/100 PY, events/100 patient-years; GI, gastrointestinal; MACE, major adverse cardiovascular event; MTX, methotrexate; NMSC, non-melanoma skin cancer; PsA, psoriatic arthritis; RA, rheumatoid arthritis; TB, tuberculosis; UPA, upadacitinib; VTE, venous thromboembolism; yo, years old.

**Online supplemental table S11** Summary of active tuberculosis cases

| Study                | Age/<br>sex | Country                      | Preferred term(s)                           | Status at screening                                | TB treatment                                                         | Risk factors                                                                                                                                                                                                                       |
|----------------------|-------------|------------------------------|---------------------------------------------|----------------------------------------------------|----------------------------------------------------------------------|------------------------------------------------------------------------------------------------------------------------------------------------------------------------------------------------------------------------------------|
| RA<br>UPA<br>M13-545 | 48/F        | Tunisia                      | Female genital<br>tract TB<br>Peritoneal TB | QuantiFERON-Gold TB test<br>negative               | Rifampicin, INH,<br>pyrazinamide, and<br>ethambutol                  | Cohabitation with individuals<br>who have had TB                                                                                                                                                                                   |
| RA<br>UPA<br>M13-549 | 40/F        | Hungary                      | TB                                          | QuantiFERON-Gold TB test<br>positive, CXR negative | Fraxiparine, INH, rifampin                                           | History of latent TB, early<br>discontinuation of prophylactic<br>INH                                                                                                                                                              |
| RA<br>UPA<br>M14-465 | 60/F        | South<br>Africa              | Pulmonary TB                                | QuantiFERON-GOLD TB test<br>positive; CXR negative | INH and pyridoxine from<br>day<br>–75 to day 255                     | Active TB in 2011, latent TB<br>on study entry, living in high<br>TB-burden region                                                                                                                                                 |
| RA<br>UPA<br>M14-465 | 72/M        | Brazil                       | Pulmonary TB                                | QuantiFERON-Gold TB test<br>positive               | Rifampicin, INH,<br>pyrazinamide, and<br>ethambutol                  | History of latent TB                                                                                                                                                                                                               |
| RA<br>UPA<br>M14-465 | 67/F        | Korea                        | Disseminated TB                             |                                                    | Rifampin, pyrazinamide,<br>ethambutol, INH                           | History of latent TB. Patient<br>received INH for TB<br>prophylaxis 2 year before<br>event of interest                                                                                                                             |
| RA<br>ADA<br>M14-465 | 64/F        | Estonia                      | TB                                          | QuantiFERON-Gold TB test<br>negative               | Amikacin, cycloserine,<br>levofloxacin, linezolid, and<br>ethambutol | History of latent TB                                                                                                                                                                                                               |
| RA<br>ADA<br>M14-465 | 63/F        | Argentina                    | Pulmonary TB                                | QuantiFERON-Gold TB test<br>negative               | Isoniazid, rifampicin,<br>pyrazinamide, ethambutol                   |                                                                                                                                                                                                                                    |
| RA<br>ADA<br>M14-465 | 62/M        | Bosnia<br>and<br>Herzegovina | TB                                          | QuantiFERON-Gold TB test<br>negative               | Isoniazid, pyridoxine                                                | Positive QuantiFERON TB<br>test 1 year before event of<br>active TB and received INH<br>and pyridoxine for TB<br>prophylaxis for 6 months.<br>Diagnosis of active TB was<br>made 6 months after end of<br>TB prophylaxis treatment |



| Study                   | Age/<br>sex | Country | Preferred term(s) | Status at screening                                | TB treatment                                            | Risk factors                                                                                               |
|-------------------------|-------------|---------|-------------------|----------------------------------------------------|---------------------------------------------------------|------------------------------------------------------------------------------------------------------------|
| AD<br>UPA 15<br>M16-045 | 27/M        | Russia  | Pulmonary TB      | QuantiFERON-Gold TB test<br>negative and clear CXR | Pyrazinamide and<br>levofloxacin                        | Living in high TB-burden<br>country                                                                        |
| AD<br>UPA 30<br>M18-891 | 29/M        | Canada  | TB                | QuantiFERON-Gold TB test<br>negative               | Rifampin, isoniazid,<br>ethambutol, and<br>pyrazinamide | Trip to Korea before symptom<br>onset (travel to endemic<br>country); also traveled to<br>Taiwan and Japan |

AD, atopic dermatitis; ADA, adalimumab; CXR, chest radiograph; F, female; INH, isoniazid; M, male; RA, rheumatoid arthritis; TB, tuberculosis; UPA, upadacitinib

**Online Supplemental Figure S1** Incidence rates for TEAEs of special interest\*

\*RA: UPA 15 mg QD (N = 3209), ADA 40 mg EOW (N = 579), MTX (N = 314); PsA: UPA 15 mg QD (N = 907), ADA 40 mg EOW (N = 429); AS: UPA 15 mg QD (N = 182); AD: UPA 15 mg QD (N = 1340), UPA 30 mg QD (N = 1353).

†Excluding TB, oral candidiasis, and herpes zoster.

‡Defined as cardiovascular death, non-fatal myocardial infarction, and non-fatal stroke.

§Including deep vein thrombosis and pulmonary embolism.

AD, atopic dermatitis; ADA, adalimumab; AS, ankylosing spondylitis; CPK, creatine phosphokinase; E, event; EOW, every other week; GI, gastrointestinal; MACE, major adverse cardiovascular events; NMSC, non-melanoma skin cancer; PsA, psoriatic arthritis; PY, patient years; QD, once daily; RA, rheumatoid arthritis; TB, tuberculosis; TEAE, treatment-emergent adverse event; UPA, upadacitinib; VTE, venous thromboembolic events.

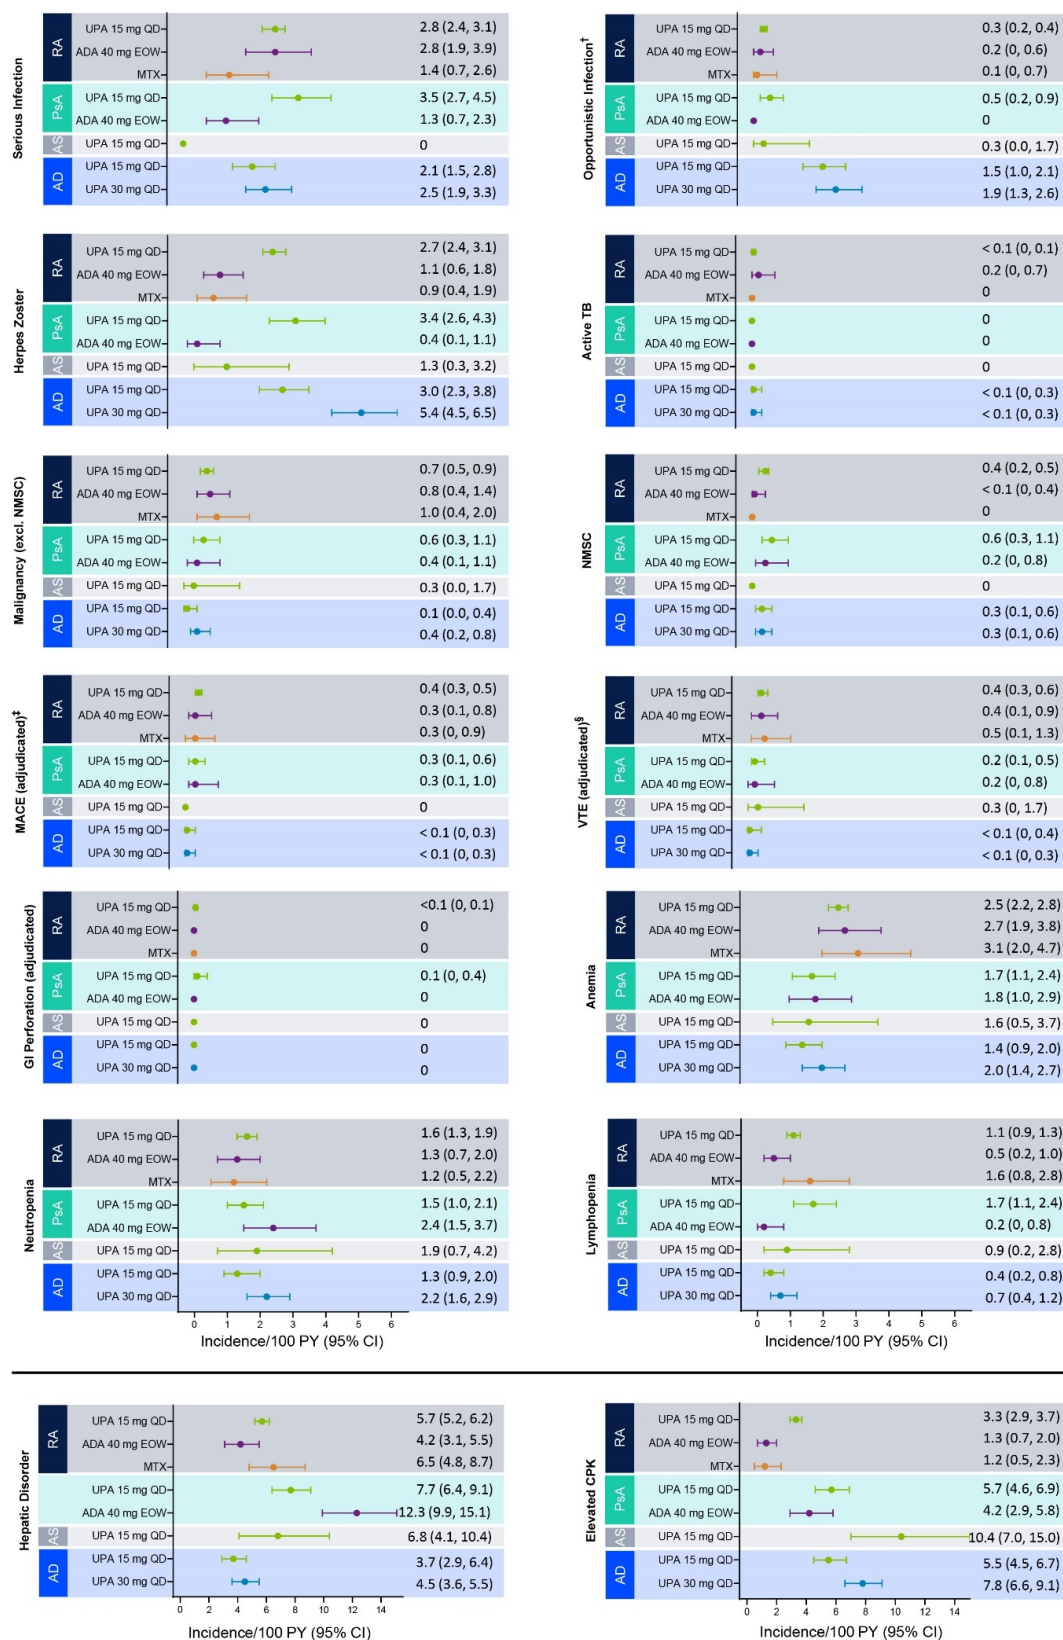

Online Supplemental Figure S2 Treatment-emergent serious infections over time

AD, atopic dermatitis; ADA, adalimumab; AS, ankylosing spondylitis; E, event; EOW, every other week; EAER, exposure-adjusted event rate; MTX, methotrexate; PsA, psoriatic arthritis; PY, person-years; QD, every day; RA, rheumatoid arthritis; UPA, upadacitinib.

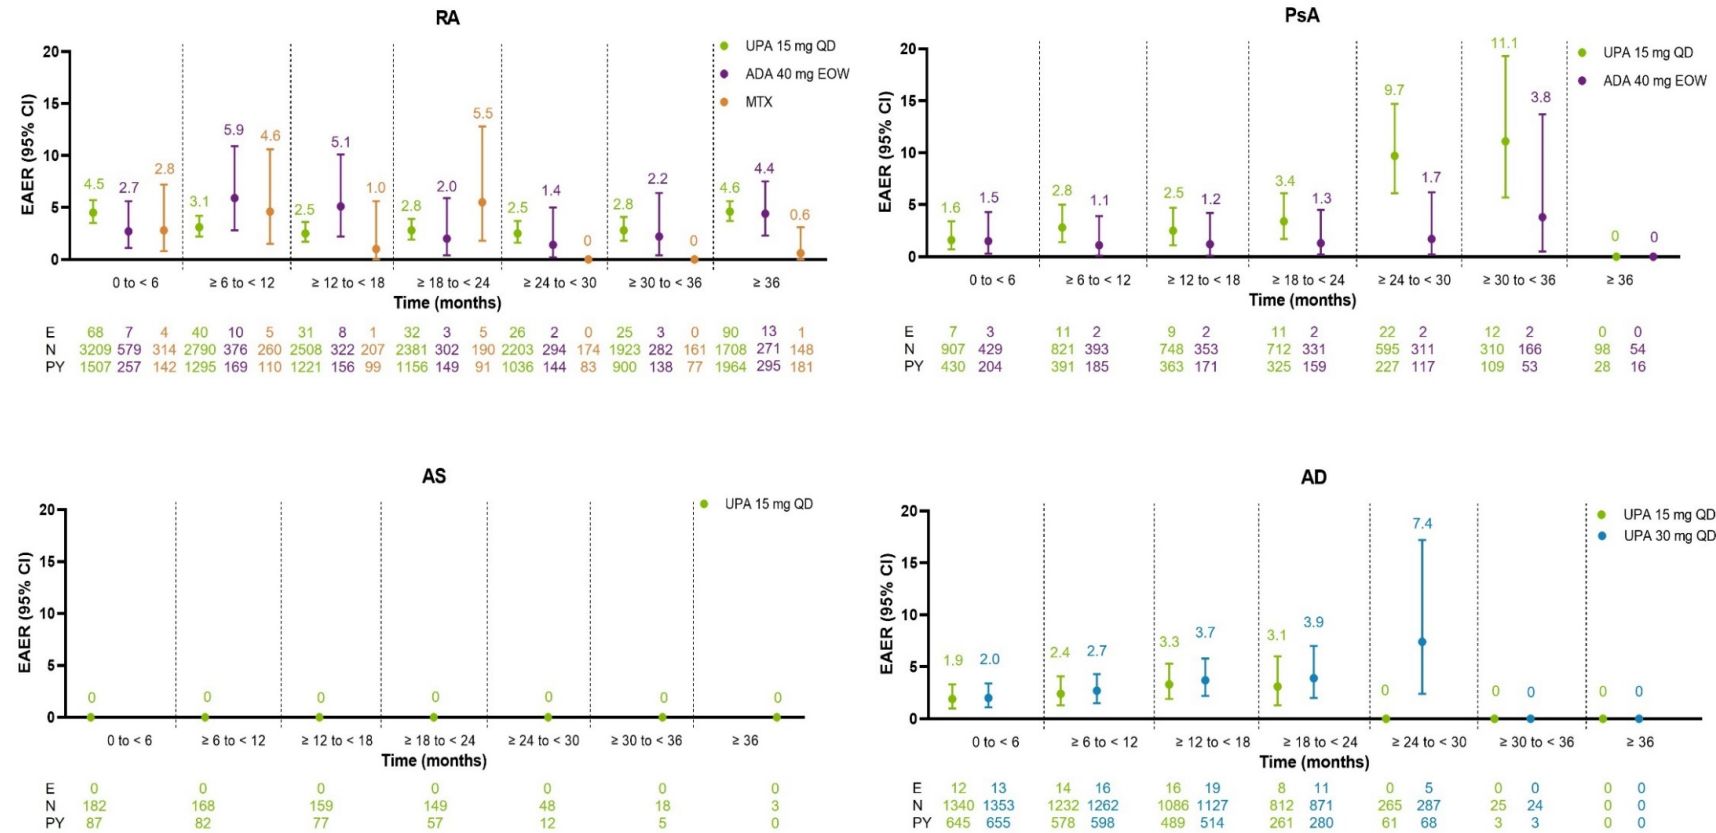

Online Supplemental Figure S3 Treatment-emergent herpes zoster over time

AD, atopic dermatitis; ADA, adalimumab; AS, ankylosing spondylitis; E, event; EOW, every other week; EAER, exposure-adjusted event rate; MTX, methotrexate; PsA, psoriatic arthritis; PY, person-years; QD, every day; RA, rheumatoid arthritis; UPA, upadacitinib.

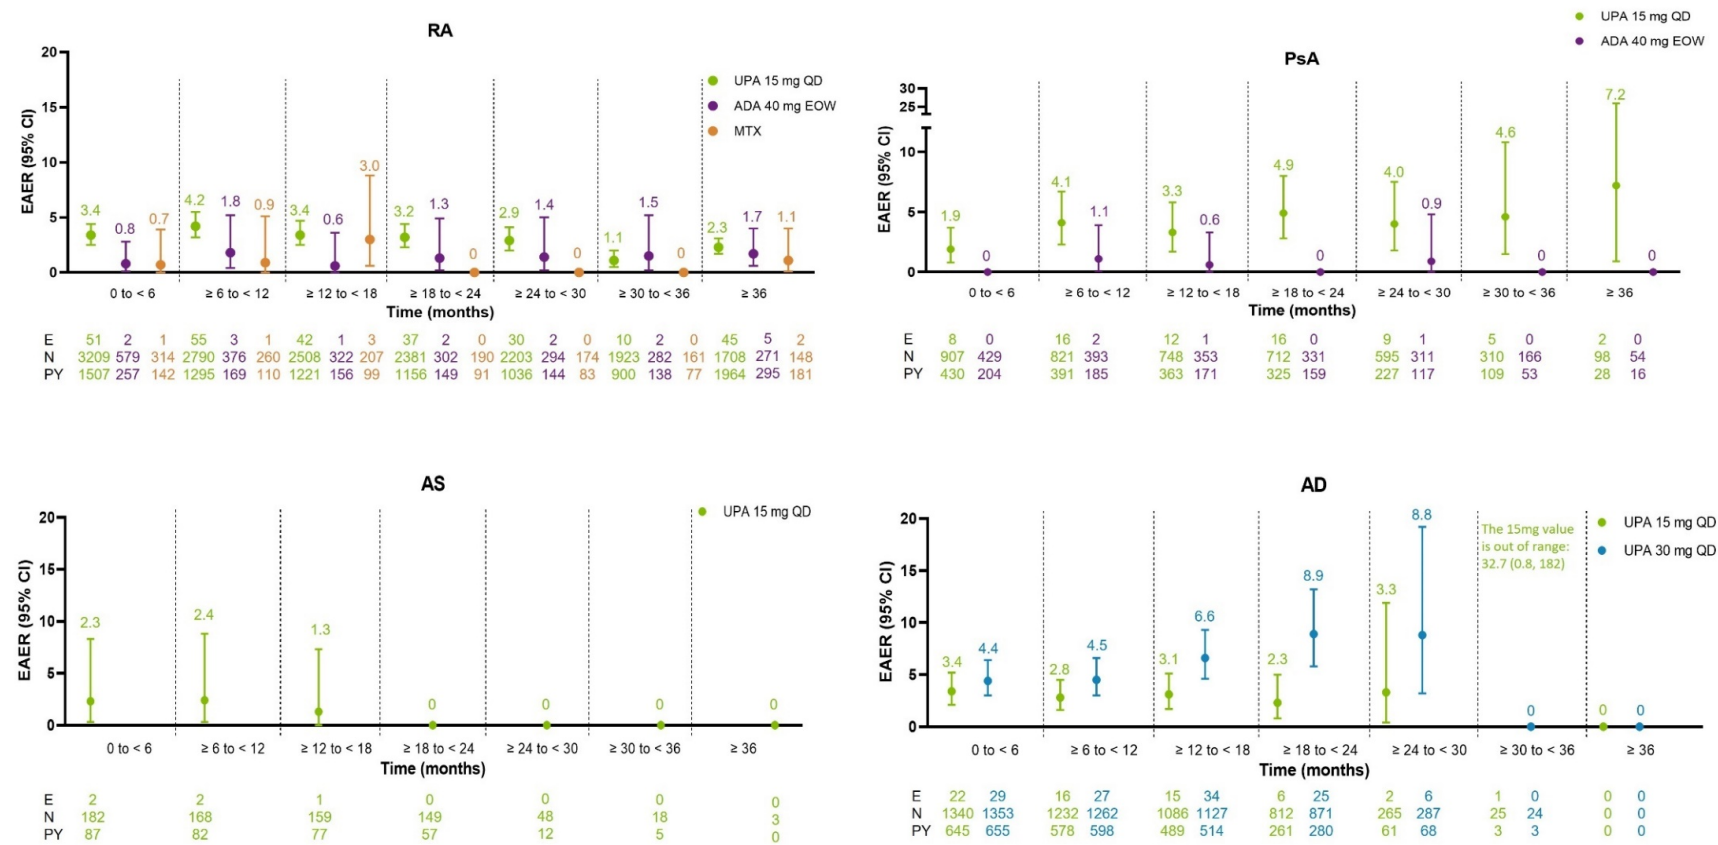

Online Supplemental Figure S4 Treatment-emergent malignancy excluding NMSC over time

AD, atopic dermatitis; ADA, adalimumab; AS, ankylosing spondylitis; E, event; EOW, every other week; EAER, exposure-adjusted event rate; MTX, methotrexate; NMSC, nonmelanoma skin cancer; PsA, psoriatic arthritis; PY, person-years; QD, every day; RA, rheumatoid arthritis; UPA, upadacitinib.

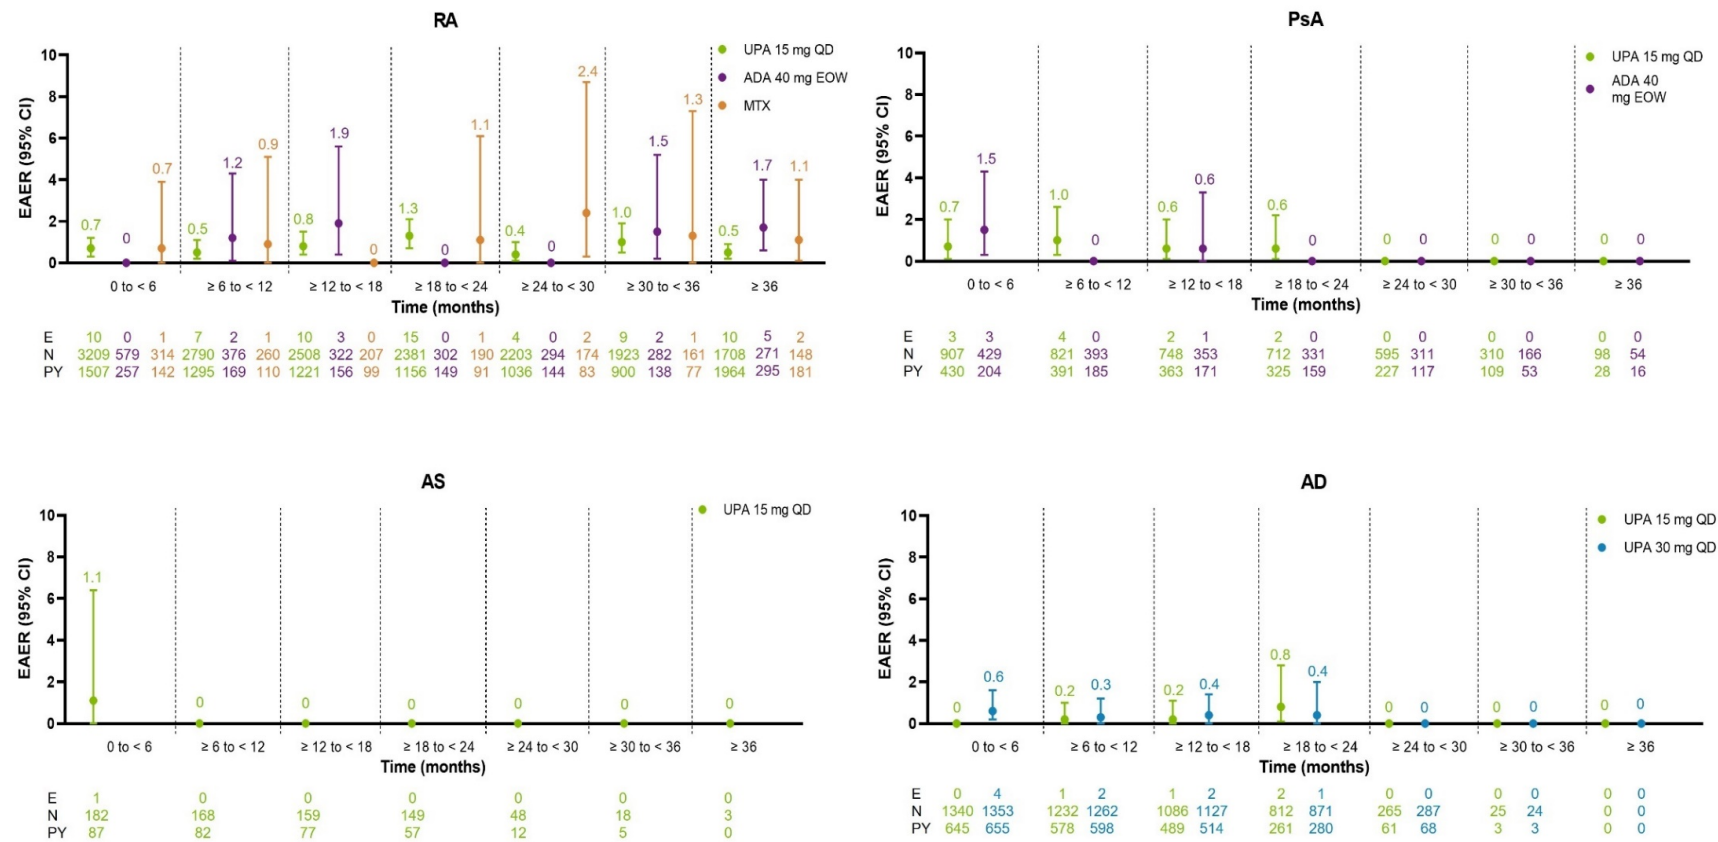

Online Supplemental Figure S5 Treatment-emergent MACE over time

AD, atopic dermatitis; ADA, adalimumab; AS, ankylosing spondylitis; E, event; EOW, every other week; EAER, exposure-adjusted event rate; MACE, major adverse cardiovascular event; MTX, methotrexate; PsA, psoriatic arthritis; PY, person-years; QD, every day; RA, rheumatoid arthritis; UPA, upadacitinib.

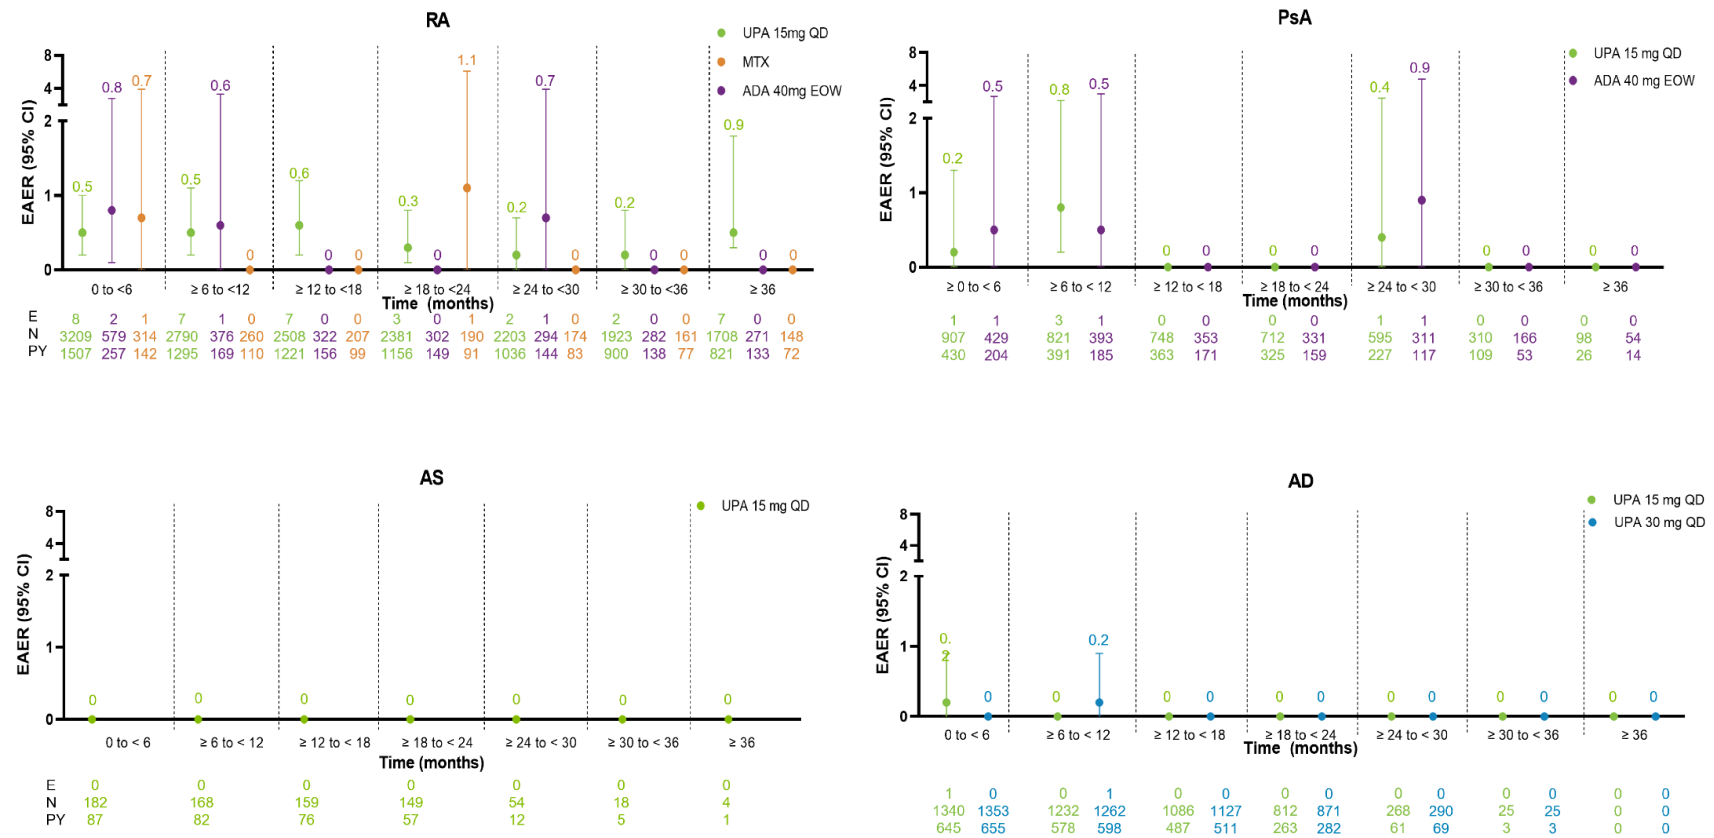



Online Supplemental Figure S6 Treatment-emergent VTE over time

AD, atopic dermatitis; ADA, adalimumab; AS, ankylosing spondylitis; E, event; EOW, every other week; EAER, exposure-adjusted event rate; MTX, methotrexate; NMSC, nonmelanoma skin cancer; PsA, psoriatic arthritis; PY, person-years; QD, every day; RA, rheumatoid arthritis; UPA, upadacitinib; VTE, venous thromboembolism.

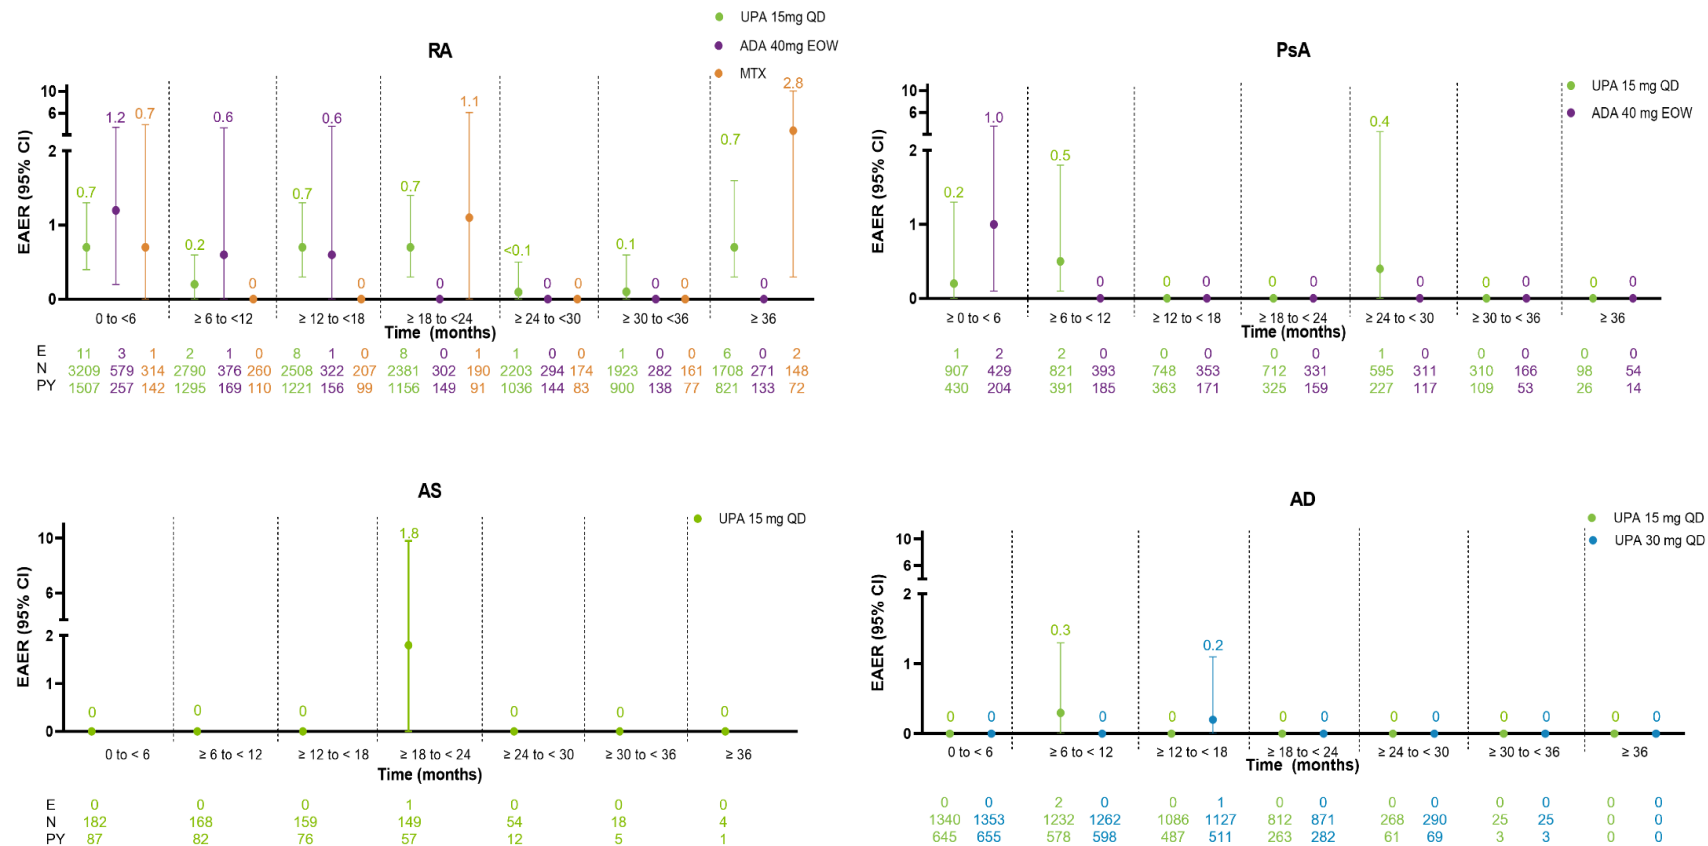



**Online Supplemental Figure S7** Exposure-adjusted rates for TEAEs of special interest by upadacitinib monotherapy and upadacitinib combination therapy\*

\*RA: UPA 15 mg QD Mono (N = 661), UPA 15 mg QD Combo (N = 2548); PsA: UPA 15 mg QD Mono (N = 265), UPA 15 mg QD Combo (N = 642).

†Excluding TB, oral candidiasis, and herpes zoster.

‡Defined as cardiovascular death, non-fatal myocardial infarction, and non-fatal stroke.

§Including deep vein thrombosis and pulmonary embolism.

CPK, creatine phosphokinase; E, event; GI, gastrointestinal; MACE, major adverse cardiovascular events; NMSC, non-melanoma skin cancer; PsA, psoriatic arthritis; PY, patient years; QD, once daily; RA, rheumatoid arthritis; TB, tuberculosis; TEAE, treatment-emergent adverse event; UPA, upadacitinib; VTE, venous thromboembolic events.

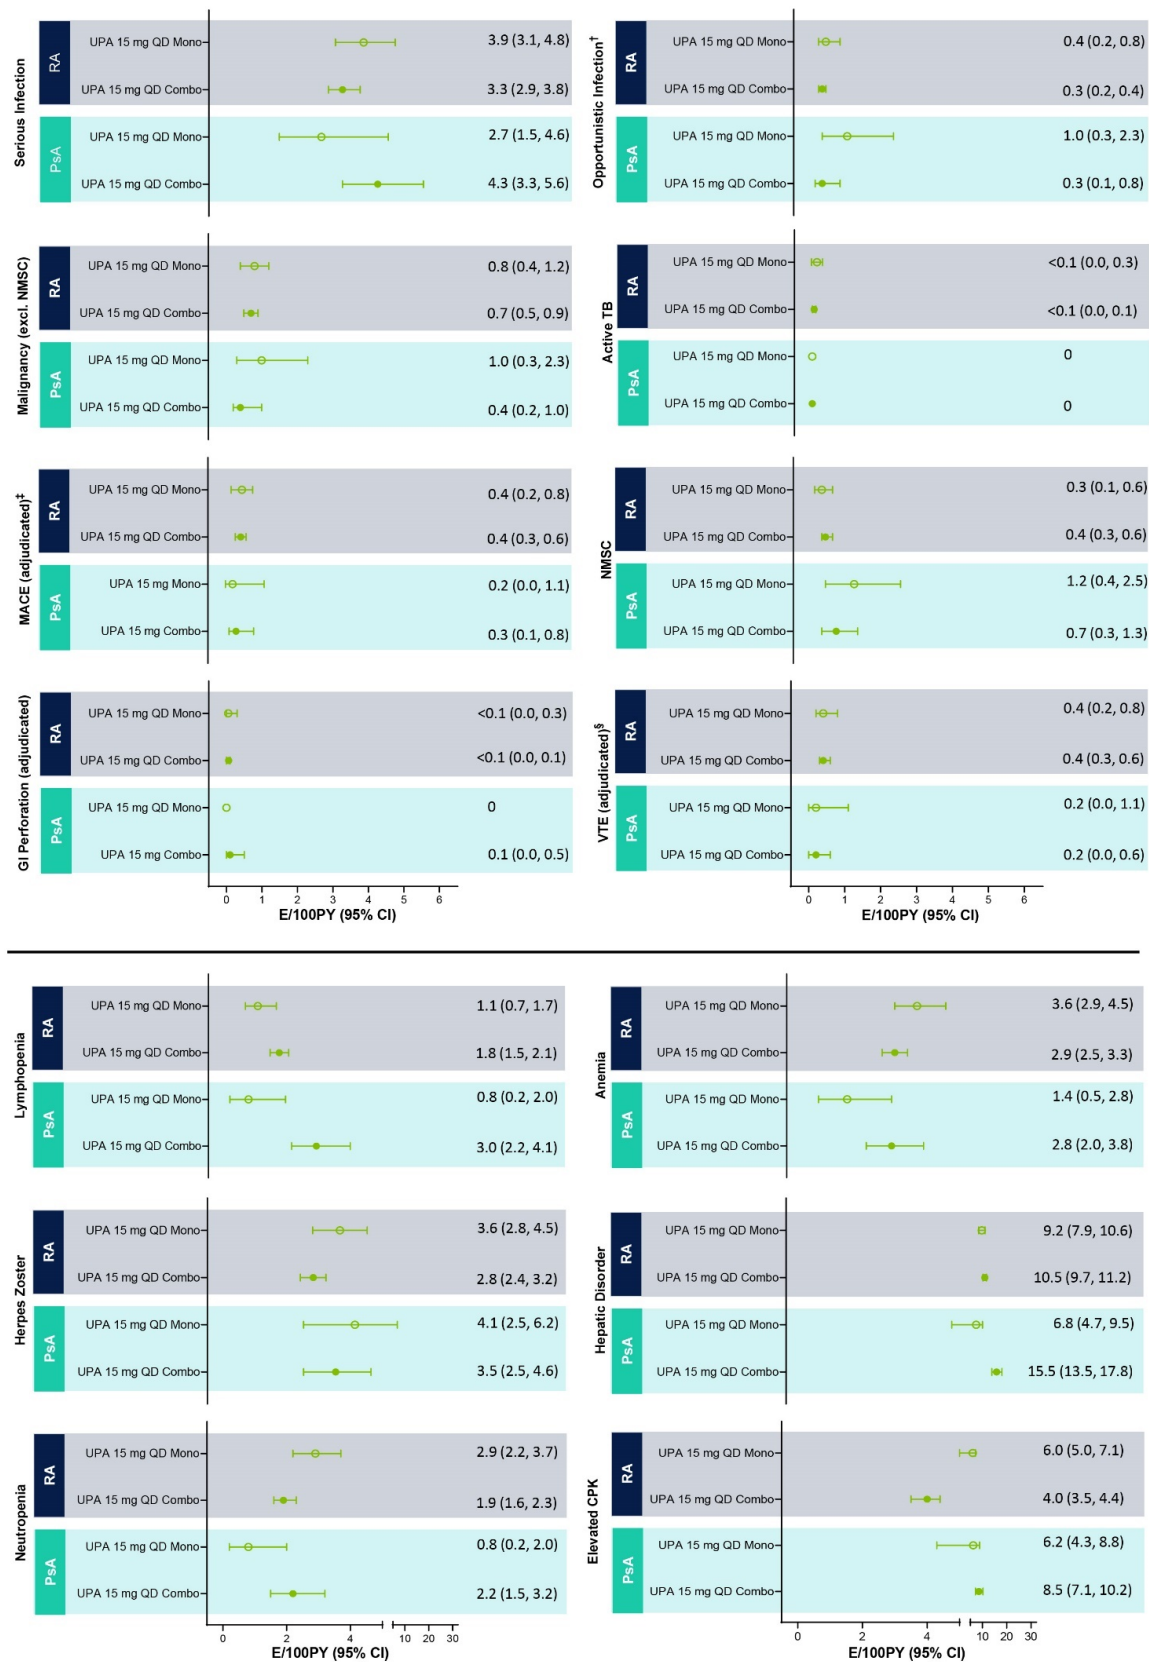

Supplement: rmdopen-2022-002735supp001_data_supplement.pdf [file rmdopen-2022-002735supp001_data_supplement.pdf]
